1 **A modified porous silicon microparticle promotes mucosal delivery of SARS-CoV-2 antigen and**  
2 **induction of potent and durable systemic and mucosal T helper 1 skewed protective immunity**

3

4 Awadalkareem Adam<sup>1, #</sup>, Qing Shi<sup>2, #</sup>, Binbin Wang<sup>1</sup>, Jing Zou<sup>3</sup>, Junhua Mai<sup>2</sup>, Samantha R Osman<sup>1</sup>,  
5 Wenzhe Wu<sup>4</sup>, Xuping Xie<sup>3</sup>, Patricia V Aguilar<sup>5,6,7</sup>, Xiaoyong Bao<sup>4,7</sup>, Pei-Yong Shi<sup>3,6,7</sup>, Haifa Shen<sup>2,8,9,\*</sup>,  
6 and Tian Wang<sup>1,5,6,7,\*</sup>

7

8 <sup>1</sup>Department of Microbiology & Immunology, University of Texas Medical Branch, Galveston, TX,  
9 77555, USA. <sup>2</sup>Department of Nanomedicine, Houston Methodist Academic Institute, Houston, TX  
10 77030. <sup>3</sup>Department of Biochemistry & Molecular Biology, University of Texas Medical Branch,  
11 Galveston, TX, 77555, USA. <sup>4</sup>Department of Pediatrics, The University of Texas Medical Branch,  
12 Galveston, TX 77555, USA. <sup>5</sup>Department of Pathology, University of Texas Medical Branch, Galveston,  
13 TX, 77555, USA. <sup>6</sup> Sealy Institute for Vaccine Sciences, University of Texas Medical Branch, Galveston,  
14 TX 77555, USA. <sup>7</sup> Institute for Human Infections and Immunity, University of Texas Medical Branch,  
15 Galveston, TX, 77555, USA. <sup>8</sup> Innovative Therapeutic Program, Houston Methodist Cancer Center,  
16 Houston, TX 77030. <sup>9</sup> Department of Cell and Developmental Biology, Weill Cornell Medicine, New  
17 York, NY 10065

18

19 # Equal contribution

20 \*Correspondence author: Haifa Shen: [haifashen@gmail.com](mailto:haifashen@gmail.com); or Tian Wang: [ti1wang@utmb.edu](mailto:ti1wang@utmb.edu)

21

22 Running Title: A modified PSM-based SARS-CoV-2 subunit vaccine

23

24 **ABSTRACT**

25 Development of optimal SARS-CoV-2 vaccines to induce potent, long-lasting immunity and provide  
26 cross-reactive protection against emerging variants remains a high priority. Here, we report that a  
27 modified porous silicon microparticle (mPSM)-adjuvanted SARS-CoV-2 receptor-binding domain (RBD)  
28 vaccine activated dendritic cells and generated more potent and durable SARS-CoV-2- specific systemic  
29 humoral and type 1 helper T (Th) cell- mediated immune responses than alum-formulated RBD following  
30 parenteral vaccination, and protected mice from SARS-CoV-2 and Beta variant infection. mPSM  
31 facilitated the uptake of SARS-CoV-2 RBD antigens by nasal and airway epithelial cells. Parenteral and  
32 intranasal prime and boost vaccinations with mPSM-RBD elicited potent systemic and lung resident  
33 memory T and B cells and SARS-CoV-2 specific IgA responses, and markedly diminished viral loads and  
34 inflammation in the lung following SARS-CoV-2 Delta variant infection. Our results suggest that mPSM  
35 can serve as potent adjuvant for SARS-CoV-2 subunit vaccine which is effective for systemic and  
36 mucosal vaccination.

37

38 **Keywords:** Vaccine, nanoparticle, mucosal immunity, SARS-CoV-2

39

## 40 INTRODUCTION

41 The coronavirus disease 2019 (COVID-19) pandemic, which was caused by severe acute respiratory  
42 syndrome coronavirus 2 (SARS-CoV-2), has caused a devastating impact on global public health and  
43 economy over the past two years. SARS-CoV-2 belongs to the genus *Betacoronavirus* ( $\beta$ -COV) of the  
44 family *Coronaviridae* and contains a single-stranded positive-sense RNA genome. The genome encodes  
45 structural proteins (spike [S], envelope [E], membrane [M] and nucleocapsid [N]), nonstructural proteins  
46 (nsp1-nsp16), and several accessory proteins<sup>1</sup>. The S protein is the major virus surface glycoprotein that  
47 engages the interaction with human angiotensin-converting enzyme 2 (hACE2) through its receptor-  
48 binding domain (RBD) and facilitates virus entry into target cells. Both the S protein and the RBD can  
49 elicit highly potent neutralizing antibodies (NAbs) and contain major T cell epitopes, thus have been the  
50 main targets for vaccine development<sup>2-4</sup>.

51 In response to the pandemic, many vaccine platforms have been rapidly developed and tested to  
52 enable production of effective vaccines against SARS-CoV-2 infection. This includes inactivated  
53 vaccines, subunit vaccines, DNA vaccines, mRNA vaccines, viral vectored vaccines, and live-attenuated  
54 vaccines<sup>1,5-9</sup>. Currently, three vaccines have been granted emergency use authorization (EUA) from the  
55 FDA. However, the increasing rate of emergence of variants with enhanced viral transmission and disease  
56 severity in COVID-19 patients<sup>10,11</sup>, potential concerns of “vaccine-induced disease enhancement”<sup>12</sup> and  
57 risk of antibody-dependent enhancement due to waning immunity after vaccination<sup>13</sup> have together posed  
58 additional challenges for the global vaccine efficiency efforts. It is clear that continuous efforts toward  
59 optimizing existing vaccine platforms and development of more effective novel vaccines are needed.

60 In this study, we tested the immunogenicity of a novel adjuvant comprised of a modified porous  
61 silicon microparticle (mPSM) for the SARS-CoV-2 S protein RBD subunit vaccine (mPSM-RBD). We  
62 also assessed the protective efficacy of mPSM-RBD vaccine in animal models of SARS-CoV-2 infection.  
63 PSMs can serve as a carrier and a reservoir to maintain sustained release of proteins and peptide antigens  
64 inside dendritic cell (DC)s<sup>14</sup>. We previously identified PSM as a potent activator of type I interferon  
65 (IFN I) responses in DCs, and its protective effects as an adjuvant for cancer vaccines to stimulate T

66 helper 1 (Th1) immunity. More recently, we found that mPSM, prepared by loading the TLR9 ligand  
67 cytosine guanosine dinucleotide (CpG) and STING agonist cyclic 2',3'-GAMP (cGAMP)- to PSMs, can  
68 serve as a more potent adjuvant for tumor antigen to elicit higher levels of IFN I and inflammatory  
69 cytokines in DCs than PSM alone, and induces strong anti-tumor Th1 type immunity<sup>15</sup>. Here, we report  
70 that mPSM-RBD vaccine triggers more potent, and durable systematic Th1-prone immune responses than  
71 alum-RBD following parenteral vaccination in mice and protects mice against SARS-CoV-2 and Beta  
72 variant infection. In addition, mPSM facilitated mucosal delivery of SARS-CoV-2 RBD antigens.  
73 Parenteral and mucosal prime-boost vaccination promoted the induction of SARS-CoV-2- specific  
74 systematic and lung-resident Th1 and IgA immune responses, and protected mice from SARS-CoV-2  
75 Delta variant infection.

76

77

## 78 **RESULTS**

79 **mPSM is a potent adjuvant for SARS-CoV-2 RBD subunit vaccine and triggers SARS-CoV-2 -**  
80 **specific antibody production with minimal adverse effects upon parenteral vaccination in mice.** The  
81 RBD of SARS-CoV-2 S protein is considered to be the major protective antigen, which elicits highly  
82 potent neutralization antibodies <sup>4</sup>. To express and purify the S RBD domain, a DNA fragment encoding  
83 amino acid residues 319 to 541 of SARS-CoV-2 S protein was cloned into the lentivirus vector pCDH-  
84 CMV-MCS-EF1 $\alpha$ -RFP which was then applied to transduce 293FT cells. To facilitate the secretion and  
85 purification of the protein, the first 19 residues of the S protein and a hexahistidine (6xHis) tag were fused  
86 at the N-terminal as a secretion signal and the C-terminal respectively. The recombinant RBD protein (25  
87 to 30 kDa) was purified from the cell culture supernatant (**Fig 1A-B**). The protein antigen was packaged  
88 into mPSM to prepare a SARS-CoV-2 RBD subunit vaccine (mPSM-RBD) following our recently  
89 described protocol <sup>15</sup>. To assess the effects of mPSM-RBD on DC activation and antigen presentation,  
90 bone marrow-derived DCs (BMDCs) isolated from BALB/c mice were treated with PBS (mock), RBD  
91 alone or together with either Alum, or mPSM. The production of proinflammatory cytokines, including  
92 IL-6, IL-12p70, and TNF- $\alpha$  was markedly increased in mPSM-RBD -treated but not in alum-RBD- or  
93 mock -treated DCs. Cell surface co-stimulation molecules, such as CD80 and CD86 expression was also  
94 enhanced in the mPSM-RBD -treated, but not in the alum-RBD- treated DCs (**Fig 1C-D, Fig. S1A**),  
95 which together suggest a role of mPSM in promoting activation of antigen presenting cells (APC). To  
96 assess whether mPSM-RBD vaccination produces SARS-CoV-2- specific antibody responses, sera of  
97 mice vaccinated with RBD alone, alum-RBD, or mPSM-RBD were collected one month post vaccination  
98 to determine their inhibitory effects on RBD binding to its receptor ACE2. While serum from Alum-  
99 RBD- vaccinated mice diminished RBD binding to ACE2, that from mPSM-RBD-treated mice nearly  
100 abolished binding of ACE2 to RBD protein (**Fig 1E**). Routes of parenteral vaccination were also  
101 compared. Mice were primed and boosted with mPSM-RBD (5  $\mu$ g) via intradermal (i.d.), intramuscular  
102 (i.m.), or intraperitoneal (i.p.) inoculation. All three routes of inoculation resulted in high titers of RBD-  
103 binding IgG2a, IgG2b, and IgG1 subtypes IgG antibodies at one month post vaccination (**Fig 1F**). To

104 further assess the effects of mPSM-RBD dosing in mice, mice were vaccinated i.d. with 1 to 50  $\mu$ g  
105 mPSM-RBD. Interestingly, vaccination with as little as 5  $\mu$ g mPSM-RBD triggered similar levels of  
106 IgG2b responses as elicited by 25 and 50  $\mu$ g mPSM-RBD, which remained high more than 180 days post  
107 vaccination. However, 25 and 50  $\mu$ g mPSM-RBD triggered much stronger IgG2a and IgG1 responses  
108 than the 5  $\mu$ g mPSM-RBD group (**Fig 1G**). Lastly, mPSM-RBD was applied to evaluate potential  
109 toxicity, and biomarkers including urea nitrogen (BUN), albumin (ALB), calcium (CA), creatinine  
110 (CRE), glucose (GLU), phosphorus (PHOS), and total protein (TP) were assessed. No significant  
111 difference between mPSM-RBD and PBS control was observed (**Fig S1B-E**), which indicates no severe  
112 toxicity from mPSM-RBD in mice. Overall, these results suggest that mPSM serves as a potent and safe  
113 adjuvant for SARS-CoV-2 RBD subunit vaccine.

114

115 **Parenteral vaccination with mPSM-RBD subunit vaccine generated strong and durable**  
116 **systemic SARS-CoV-2- specific humoral and type 1 helper T (Th) cell- mediated immune responses**  
117 **in different strains of mice.** BALB/c and C57BL/6 mice were i.d. inoculated with PBS control, RBD (5  
118  $\mu$ g) alone, alum-RBD (5  $\mu$ g), or mPSM-RBD (5  $\mu$ g) on day 0 and boosted with the same dose on day 14.  
119 Sera were collected at days 7, 14 and 21 to determine antibody titers (**Fig 2A**). mPSM-RBD group  
120 showed  $10^3$  to  $10^7$  titers of RBD binding IgG subtype antibodies (IgG2a, IgG2b, and IgG1) on days 7, 14  
121 and 21. In comparison, alum-RBD vaccination barely induced any RBD IgG2a and IgG2b antibodies,  
122 and only low titers of RBD- binding IgG1 antibodies after day 14 (**Fig 2B**). While both alum-RBD and  
123 mPSM-RBD produced similar levels of RBD -binding IgG1 antibodies in B6 mice, only the latter  
124 induced RBD-specific IgG2b responses (**Fig S2A-B**). On day 30, mPSM-RBD -vaccinated BALB/c mice  
125 had over 3- fold more SARS-COV-2 S- specific IgG<sup>+</sup> splenic B cells (**Fig 2C, D**) and the splenocytes  
126 produced over 8 -fold higher IFN- $\gamma$  upon *in vitro* re-stimulation with S peptide pools compared to the  
127 alum-RBD group (**Fig 2E, F**). mPSM- RBD vaccination also triggered more robust SARS-COV-2-  
128 specific splenic B and T cell responses in B6 mice compared to alum-RBD vaccine (**Fig S2C-F**).  
129 Cytokines secreted by Th1 cells are known to mediate isotype switching to IgG2a, whereas cytokines

130 secreted by Th2 cells mediate isotype switching to IgG<sub>1</sub><sup>16</sup>. Thus, the above results suggest that the  
131 mPSM-RBD vaccine promotes stronger humoral and Th1-prone immune responses in mice.

132 To assess the durability of mPSM-RBD- induced immunity, BALB/c mice were immunized i.d. with  
133 PBS (mock), mPSM-RBD (5 µg), or Alum-RBD (5 µg) on days 0 and 14. Longitudinal sera samples were  
134 collected over the course of 7 months to determine SARS-CoV-2- specific antibody responses (**Fig 3A**).  
135 mPSM-RBD vaccination triggered the production of SARS-CoV-2 RBD-binding IgG2a, IgG2b and IgG1  
136 antibodies on day 10, which reached to the peak response around 4 weeks but remained high even at 7  
137 months post vaccination. In contrast, RBD-binding IgG2a and IgG2b antibodies were barely detectable  
138 except for lower IgG1 responses in alum-RBD-vaccinated mice (**Fig 3B-D**). In addition, mPSM-RBD-  
139 vaccinated mice showed more than 100 times higher titers of RBD- binding total IgG 4.5 months post  
140 vaccination compared to mice treated with alum-RBD (**Fig S3A-B**). Furthermore, high Nab titers were  
141 detected at 1 month in the majority of mPSM-RBD-vaccinated mice and remained at a similar level 5  
142 months later in all vaccinated mice; in comparison, Nab was barely detectable in any alum-RBD-  
143 vaccinated mice throughout the time (**Fig 3E**). Moreover, while both mPSM-RBD and alum-RBD  
144 vaccinations induced RBD- specific IgG<sup>+</sup> B cell responses, there were 2.5-fold as many S -specific IgG<sup>+</sup>  
145 splenic B cells and 1.5-fold as many SARS-COV-2-specific splenic Th1 cells in the mPSM-RBD group  
146 compared to the alum-RBD group 7 months post vaccination (**Fig 3F-J**). Both mPSM-RBD and alum-  
147 RBD-vaccinated mice showed higher SARS-COV-2 S- specific IgA<sup>+</sup> splenic B cells than the mock group  
148 at the 7-month time point (**Fig S3C-D**). Taken together, parenteral vaccination with mPSM-RBD  
149 induced stronger and more durable SARS-CoV-2-specific IgG<sup>+</sup> B cells, higher Nab titers, and Th1-prone  
150 immune responses than alum-RBD in mice.

151  
152 **mPSM-RBD provides more durable and potent protection against SARS-CoV-2 and Beta**  
153 **variant infection following single or two dose parenteral vaccination in mice.** To assess the efficacy  
154 of mPSM-RBD in protecting the host against SARS-CoV-2 infection, BALB/c mice were vaccinated with  
155 alum-RBD (5 µg), mPSM-RBD (5 µg), or mock i.p. on day 0 and boosted with the same dose on day 21.

156 At 1 month post vaccination, mice were i.n. challenged with  $2 \times 10^4$  PFU mouse-adapted SARS-CoV-2  
157 strain CMA4<sup>17</sup>. Mice were euthanized two days after infection (**Fig S4A**). There were lower viral loads  
158 and attenuated levels of inflammatory cytokines, including CCL2, CCL7 and CXCL10 in the lung of  
159 mPSM-RBD group compared to the mock group. Alum-RBD- vaccinated mice also showed similar  
160 reductions on viral loads and inflammation in the lung (**Fig S4B-E**). In another study, mice were i.n.  
161 challenged with  $2 \times 10^4$  PFU of the mouse-adapted SARS-CoV-2 strain CMA4 at 4.5 months post  
162 vaccination. While mice in both mock and alum-RBD groups exhibited  $10^2$  to  $10^3$  PFU/ml viral loads in  
163 the lung tissues; no detectable viral titers were measured in the mPSM-RBD group at day 4 post infection  
164 (**Fig 4A-B**). In addition, lung inflammation was assessed by measurement of proinflammatory cytokines  
165 (IL-1 $\beta$ , IL-6) and chemokines (CCL2, CCL7, CXCL10) levels (**Fig 4C-H**). The mPSM-RBD-vaccinated  
166 mice had significantly reduced levels of inflammation compared to the mock and the alum-RBD group.  
167 Furthermore, to assess protective efficacy from a single dose vaccination, 6-8-week-old K18 hACE2 mice  
168 were treated i.p. with PBS (mock), alum-RBD (25  $\mu$ g), or mPSM-RBD (25  $\mu$ g). Mice were challenged  
169 i.n. with  $4 \times 10^3$  PFU of SARS-CoV-2 Beta variant 1 month post vaccination. While both alum-RBD and  
170 mPSM-RBD groups showed reduced viral loads in the lung compared to the mock group, mice in the  
171 mPSM-RBD group had 40% lower viral load in the lungs than those in the alum-RBD group (**Fig 4I, J**).  
172 In summary, these data showed that the mPSM-RBD vaccine triggered more durable and stronger  
173 protection against SARS-CoV-2 and Beta variant infection than the alum-RBD vaccine following single  
174 or two doses of parenteral vaccination.

175  
176 **mPSM promotes nasal and airway epithelial cells uptake of SARS-CoV-2 RBD antigen;**  
177 **intranasal boost with mPSM-RBD triggers higher levels of SARS-CoV-2 -specific mucosal immune**  
178 **responses and protect the host against SARS-CoV-2 Delta variant infection.** The magnitude of virus-  
179 specific T cells in the lung is known to be associated with better prophylaxis of COVID-19 patients<sup>18</sup>.  
180 Mucosal vaccination is likely to be more effective in control of virus spread as it can enhance lung  
181 resident memory T cells compared to parenteral injection<sup>19</sup>. To determine whether mPSM could also



182 serve as an efficient carrier for mucosal delivery of SARS-CoV-2 antigen, we assessed RBD antigen  
183 uptake by the upper respiratory epithelial cells. Cy5-labeled mPSM-RBD was applied to treat human  
184 small airway epithelial cells (SAEC) and human nasal cell line RPMI2650, and intracellular particle  
185 trafficking was monitored. Microscopic analysis revealed that mPSM-RBD bound to both SAECs and  
186 RPMI2650 cells, with a higher binding affinity to SAECs based on the average number of particles in  
187 each cell type (**Fig 5A**). mPSM-RBD co-localized with early endosome (EEA1<sup>+</sup>, green) as soon as 0.5 h  
188 after incubation. After 2 h and 6 h incubation, mPSM-RBD vaccine was gradually released from the  
189 particles and reached the surrounding area inside the cells. These results suggest that mPSM can  
190 effectively deliver RBD antigen and promote its uptake by upper respiratory epithelial cells. Next, we  
191 assessed SARS-CoV-2- specific immune responses in BALB/c mice following primed i.p. with PBS  
192 (mock), RBD alone, m-PSM-RBD or alum-RBD (5 µg) on day 0 and boosted i.n. with the same dose on  
193 day 21 (**Fig 5B**). Blood, bronchoalveolar lavage fluids (BAL), lung and spleen tissues were collected on  
194 day 35. In the lung, there were stronger SARS-CoV-2- specific Th1 responses in mPSM-RBD group than  
195 the alum-RBD group, and both CD4<sup>+</sup> and CD8<sup>+</sup> T cells produced more IFN $\gamma$  than the alum-RBD group  
196 (**Fig 5C-E**). While both alum-RBD and mPSM-RBD vaccinations triggered more RBD-specific IgA<sup>+</sup> B  
197 cells in the lung compared to that of the mock group, the mPSM-RBD group produced at least 2- fold as  
198 many RBD-specific IgA<sup>+</sup> B cells as those in the alum-RBD group (**Fig 5F**). In the spleen, the mPSM-  
199 RBD group showed elevated levels of IFN $\gamma$ - production than the alum-RBD group. Among splenic T  
200 cells, CD8<sup>+</sup> T cells, but not CD4<sup>+</sup>T cells, produced significantly more IFN $\gamma$  in the mPSM-RBD group than  
201 the alum-RBD group (**Fig S5A-B**). SARS-CoV-2 specific IgA<sup>+</sup> splenic B cells were also induced in the  
202 mPSM-RBD-vaccinated mice (**Fig S5C**). Furthermore, higher titers of RBD-binding IgA antibodies were  
203 detected in BAL and sera (**Fig 5H, Fig S5D**), as well as RBD-binding IgG1 and IgG2a antibodies in sera  
204 of mPSM-RBD- vaccinated mice compared to that of alum-RBD- vaccinated mice (**Fig 5I, J**). Lastly, to  
205 determine the effects of i.p/i.n. prime and boost with mPSM-RBD vaccine in host protection from SARS-  
206 CoV-2 variant infection, K18 hACE2 mice were vaccinated i.p. with PBS (mock), RBD (5 µg), m-PSM-

207 RBD (5  $\mu$ g), alum-RBD (5  $\mu$ g) on day 0 and boosted i.n. with the same dose on day 21. Mice were then  
208 i.n. challenged with  $1 \times 10^4$  PFU of SARS-CoV-2 Delta variant at day 35. On day 4 post infection, plaque  
209 and Q-PCR assays showed that mPSM-RBD group had about 685-fold and 50-fold decrease in lung viral  
210 loads compared to the mock and alum-RBD groups, respectively (**Fig 6A, B**). In addition, the mPSM-  
211 RBD-vaccinated mice also showed significantly diminished levels of inflammatory cytokines in the lung  
212 compared to those in the mock group; in comparison, no difference was detected between the alum-RBD  
213 and mock groups (**Fig 6C-E**). In conclusion, these studies demonstrated that i.n. boost with mPSM- RBD  
214 vaccine triggers stronger lung resident B cell and Th1-type immune responses and IgA production and  
215 protects the host against SARS-CoV-2 Delta variant infection.

216

217

## 218 **DISCUSSION**

219 B cell and antibody responses are critical for virus neutralization and disease control but are often of  
220 limited duration and breadth during SARS-CoV or SARS-CoV-2 infection<sup>20</sup>. Variable and sometimes  
221 low NAb titers were reported in some convalescent COVID-19 patients, suggesting other immune factors  
222 contribute to the recovery from virus -induced diseases<sup>21</sup>. T cells are known to play an important role in  
223 the clearance of SARS-CoV infection and host protection<sup>22-24</sup>. Chen et al reported that SARS-CoV-2  
224 infection caused a decrease in CD4<sup>+</sup> and CD8<sup>+</sup> T cell counts, and suppressed IFN- $\gamma$  production by CD4<sup>+</sup> T  
225 cells, which were associated with the disease severity of COVID-19<sup>25</sup>. Overall, balanced humoral and  
226 Th-1 directed cellular immune responses are important host protection against SARS-CoV-2 infection<sup>26</sup>.  
227 The S protein, including RBD, can elicit highly potent and persistent NAb and contain many T cell  
228 epitopes<sup>3</sup>. Therefore, adjuvanted S or RBD protein subunit vaccines likely represent some of the most  
229 viable strategies for rapidly eliciting SARS-CoV-2 NAb and CD4<sup>+</sup> T cell responses of various qualities  
230 depending on the adjuvant used. Currently, the most commonly used adjuvants in human vaccination,  
231 such as alum, are effective at enhancing serum antibody titers, but not Th1 responses<sup>27,28</sup>. A single dose  
232 vaccination with alum-formulated S protein induced a more Th2 prone response in mice<sup>29</sup>. Optimized  
233 vaccine strategies include adding T helper epitope with RBD antigen or combining a TLR7/8 agonist with  
234 alum have been shown to effectively trigger strong humoral immunity supplemented with cellular  
235 immunity in mice and enhance NAb titers in various animal models<sup>30,31</sup>. Here, we found that mPSM  
236 serves as a better adjuvant than alum for SARS-CoV-2 RBD subunit vaccines to elicit stronger and more  
237 durable Nabs, plus memory B cell and Th1 skewed immune responses in mice following parenteral and  
238 mucosal vaccination.

239 The PSMs contain 40-80 nm pores that can be loaded with nanoparticles, which were preferentially  
240 internalized by DCs over other types of phagocytic cells inside the body. Once inside the cells, PSM  
241 slowly degrades into non-toxic orthosilicic acid, a process that can last for as long as two weeks and the  
242 cargo inside the nanopores is gradually released<sup>32,33</sup>. Thus, PSM acts as a reservoir for sustained release  
243 of antigen and other stimulatory factors, which offers the benefit of long-term stimulation of the APCs to

244 trigger long-lasting immunity. Furthermore, PSM was previously reported to stimulate TRIF/MAVS-  
245 mediated pathways leading to activation of type I IFN responses<sup>14</sup>. mPSMs, which includes PSM CpG  
246 and cGAMP elicits stronger innate cytokine response and more potent Th-1 biased immune responses,  
247 possibly due to the synergistic immune responses via multiple intracellular signaling pathways<sup>15</sup>.

248 Intranasal immunization can lead to the induction of antigen-specific immunity in both the mucosal  
249 and systemic immune compartments<sup>19</sup>. Delivery of antigens to the sites of infection and induction of  
250 mucosal immune responses in the respiratory tract, including IgA and resident memory B and T cells  
251 provides two additional layers of protection compared to systemic vaccination<sup>34</sup>. Induction of mucosal  
252 IgA antibodies has been shown to help control several other respiratory viruses, such as SARS-CoV and  
253 RSV<sup>35-37</sup>. Compared to IgG, IgA has been shown to more effectively control SARS-CoV-2 infection in  
254 the upper respiratory tract and nasal passages<sup>38</sup>. Thus, mucosal vaccination appears to be more effective  
255 in control of SARS-CoV-2 infection and disease<sup>39,40</sup>. Current delivery of the EUA SARS-CoV-2 vaccines  
256 is limited to parenteral injection, such as intramuscular route. In fact, less than 10% of the total 100  
257 COVID-19 vaccines currently undergoing clinical trials utilizes the intranasal route<sup>34</sup>. One of the  
258 challenges with intranasal subunit vaccines is that soluble antigens delivered to the nasal passages do not  
259 breach the epithelium but instead must be transported across the epithelial barrier by specialized  
260 microfold cells to present to DCs located underneath the epithelium<sup>41</sup>. Embedded in the submucosa is the  
261 nasal-associated lymphoid tissue (NALT), which is the first site for inhaled antigen recognition in the  
262 upper respiratory tract and includes B cells, T cells, and APCs. Formulation, size, and antigen type are  
263 important factors in mucosal vaccine development because they are critical for induction of mucosal  
264 immunity. Nanoparticles with size ranging from 20 to 200 nm<sup>42</sup> can serve as carriers for drug delivery to  
265 penetrate the mucosal surface and increase retention in the lung<sup>43</sup>. mPSMs were previously reported to  
266 get trapped in endosomes for an extended amount of time, a process that benefits both DC activation and  
267 antigen processing<sup>14,15</sup>. Here, we demonstrated that mPSM promotes the uptake of SARS-CoV-2 RBD  
268 antigens by nasal and airway epithelial cells. Moreover, due to relatively rapid turnover rates of mucosal  
269 antibody and lung-resident memory T cells, we applied a 'prime and pull' vaccination strategy<sup>44</sup>. This

270 begins with conventional parenteral vaccination to elicit systemic long-lived IgG response and broader  
271 repertoire memory B and T cells (prime), followed by an intranasal boost to recruit memory B and T cells  
272 to local lung resident memory cells and IgA production (pull) to mediate protective immunity. We found  
273 that the parenteral and mucosal prime-boost vaccination elicited robust SARS-CoV-2 -specific systemic  
274 and mucosal IgA and Th1-skewed immune responses, which protected mice from SARS-CoV-2 Delta  
275 variant infection.

276 Since the pandemic started, several major new variants have been identified as associated with  
277 increased viral transmission and disease severity in COVID-19 patients in the United Kingdom, South  
278 Africa, Brazil, United States, and more recently in India <sup>10,11</sup>. Among them, the Beta variant, which was  
279 first identified in South Africa, has three mutations in the SARS-CoV-2 RBD protein, namely K417N,  
280 E484K and N501Y. The Delta variant carries seven mutations in S protein (T19R, G142D, del157/158,  
281 L452R, T478K, D614G, P681R) <sup>45</sup>. Both Beta and Delta variants are of particular concern for their  
282 potential resistance to antibodies elicited by prior SARS-CoV-2 infection and/or vaccination <sup>46,47</sup>.  
283 Furthermore, there is a potential concern of “vaccine-induced disease enhancement”, which was reported  
284 for certain SARS-CoV vaccine candidates <sup>12</sup> and inactivated RSV vaccines <sup>48</sup>. The potential risk of ADE  
285 mediated by Fc-receptor could be increased due to waning immunity after vaccination and possibly  
286 mutations in the SARS-CoV-2 S protein <sup>49</sup>. Due to the above concerns, the optimal COVID-19 vaccines  
287 will need to exhibit long-lasting immunity, be effective for various populations globally, and provide  
288 cross-reactive protection against emerging variants. Here, our results showed that the mPSM-RBD  
289 vaccine induced potent and durable Th-1 prone immune responses and protected mice from SARS-CoV-  
290 2, Beta and Delta variants infection. Furthermore, the mPSM-RBD vaccine did not cause toxicity in mice.

291 In conclusion, we have demonstrated that mPSM is a potent adjuvant for SARS-CoV-2 subunit  
292 vaccine and promotes intranasal delivery that triggers robust systemic and mucosal immunity. The m-  
293 PSM-based platform serves as a novel tool for the development of vaccines to effectively combat SARS-  
294 CoV-2 and other emerging RNA viruses or infectious pathogens that rely on Th1-mediated immunity.

295

## 296 **METHODS**

297 **Vaccine preparation:** To express and purify the RBD protein, the amino acid residues of 319 to 541  
298 of SARS-CoV-2 S protein were cloned into the lentivirus vector, pCDH-CMV-MCS-EF1 $\alpha$ -RFP (System  
299 Biosciences). To facilitate the secretion and purification of the protein, the first 19 residues of the S  
300 protein and a hexahistidine (6xHis) tag were fused at the N-terminal as a secretion signal and the C-  
301 terminal respectively. The vector was then packaged into lentivirus to transduce 293FT cells. RBD  
302 protein was purified from culture supernatant using His-Trap Excel nickel column (Cytiva). M-PSM was  
303 prepared to include 1  $\mu$ g CpG ODN (Invivogen) 1826 and 0.5  $\mu$ g cGAMP (Invivogen) in PSM ( $6 \times 10^7$   
304 particles) as described previously<sup>14,15</sup>. 25  $\mu$ l of Imject Alum (ThermoFisher) was mixed with RBD protein  
305 30 min before inoculation.

306 **Viruses:** SARS-CoV-2 Beta variant, and Delta variant were obtained from the World Reference  
307 Center for Emerging Viruses and Arboviruses (WRCEVA) at the University of Texas Medical Branch  
308 (UTMB) and were amplified twice in Vero E6 cells. The generation of the mouse-adapted SARS-CoV-2  
309 strain CMA4 was described in a recent study<sup>17</sup>. The virus stocks for experiments were sequenced to  
310 ensure no undesired mutations in the S genes during the amplification in Vero E6 cells.

311 **Mice:** 6-week-old BALB/c mice, C57BL/(B)6 mice, and K18 hACE2 mice (stock #034860) were  
312 purchased from Jackson Lab. For vaccination, mice were inoculated intraperitoneally (i.p.), intradermally  
313 (i.d.), or intramuscularly (i.m.) with 5 to 25  $\mu$ g RBD conjugated with mPSM or Alum on days 0, and 14  
314 or 21. In some experiments, mice were i.p. primed on day 0 and boosted with the same dose on day 21  
315 via i.n. inoculation. Vaccinated mice were challenged with  $1 \times 10^4$  PFU of SARS-CoV-2 CMA4, or Delta  
316 variant, or  $4 \times 10^3$  PFU SARS-CoV-2 Beta variant. Infected mice were monitored twice daily for signs of  
317 morbidity. On days 2 or 4 post infection, mice were euthanized for tissue collection. All animal  
318 experiments were approved by the Animal Care and Use Committees at UTMB and Houston Methodist  
319 Academic Institute, respectively.

320 ***In vitro* DC maturation assay:** Bone marrow (BM)-derived DCs were generated as described  
321 previously<sup>14</sup>. Briefly, BM cells isolated from BALB/c mice were cultured for 6 days in medium

322 supplemented with granulocyte-macrophage colony-stimulating factor (GM-CSF) and IL-4 (Peprotech) to  
323 generate DCs. DCs were then treated with RBD alone or together with alum or mPSM at 37°C for 24 h.  
324 Cells were harvested and stained with antibodies for cell surface markers, including CD80 or CD86  
325 antibodies (BioLegend), and acquired by a BD LSR II flow cytometer (BD Biosciences). Data were  
326 analyzed using FlowJo software (BD Biosciences).

327 **Antibody ELISA:** Plates were coated with 1 µg/mL of purified SARS-CoV-2 RBD protein overnight  
328 at 4°C. Plates were blocked with 1% BSA for 45 min at 37°C. Diluted serum samples were added and  
329 incubated for 2 h at room temperature. This will be followed by a 1 h incubation with biotinylated HRP  
330 conjugated goat anti-mouse IgG subtype antibodies (Southern Biotech). 3,3',5,5' tetramethylbenzidine  
331 (TMB, BD Biosciences) were added to the well for 15 min and reactions were stopped by sulfuric acid.  
332 Absorbance at 450 nm and 570 nm were read and the absorbance at 570 nm was subtracted from the  
333 absorbance at 450 nm. Binding endpoint titers were determined using a cutoff value which is negative  
334 control+10x SD. In some experiments, ELISA plates were coated with 250 ng/well recombinant SARS-2  
335 RBD protein (RayBiotech, USA) for overnight at 4°C. The plates were washed twice with phosphate-  
336 buffered saline, containing 0.05% Tween-20 (PBS-T) and then blocked with 8% FBS for 1.5 h. Sera or  
337 bronchoalveolar lavage (BAL) were diluted 1:40 to 1:100 or undiluted in blocking buffer and were added  
338 for 1 h at 37°C. Plates were washed five times with PBS-T. Goat anti-mouse IgG (Sigma, MO, USA),  
339 goat anti-mouse IgG1, Goat anti-mouse IgG2a, or goat anti-mouse IgG2b (Southern Biotech) coupled to  
340 alkaline phosphatase was added at a 1:1000 to 1:2000 dilutions for 1 h at 37°C. Color was developed with  
341 *p*-nitrophenyl phosphate (Sigma-Aldrich), and the intensity was read at an absorbance of 405 nm. For IgA  
342 measurement, goat anti-mouse IgA (Southern Biotech) coupled to horseradish peroxidase (HRP) was  
343 added as the secondary antibody at a 1:2000 dilution for 1 h at 37C, followed by adding TMB (3, 3, 5, 5'-  
344 tetramethylbenzidine) peroxidase substrate (Thermo Scientific) for about 15 min. The reactions were  
345 stopped by 1M sulfuric acid, and the intensity was read at an absorbance of 450 nm.

346 **Cytokine measurement by ELISA:** TNF- $\alpha$ , IL-6, and IL-12p70 production were measured using the  
347 cytokine kits purchased from Invitrogen and following the instructions from the manufacturer.



348 **ACE2 inhibition assay:** 96-well plates were coated with 1 µg/mL of purified SARS-CoV-2 RBD  
349 protein overnight at 4 °C. Plates were washed with PBS with 0.05% TWEEN-20, followed by blocking  
350 with 1% BSA for 45 min at 37°C. Mouse sera were diluted at 1:100 in 1% BSA in PBS were incubated  
351 for 30 min at room temperature. Human recombinant ACE2-Fc-tag (Raybiotech) was then added at 1  
352 µg/mL and incubated overnight at 4 °C, followed by incubation with 0.2 µg/mL anti-ACE2 (R&D) for 1 h  
353 at room temperature. Rabbit anti-goat IgG-HRP (Santa Cruz) at 1:8000 dilution was added for 30 min at  
354 room temperature. TMB was added for 15 min and the reaction was stopped by sulfuric acid. Absorbance  
355 at 450 nm and 570 nm were read and the absorbance at 570 nm was subtracted from the absorbance at  
356 450 nm.

357 **Quantitative PCR (Q-PCR):** Viral-infected cells or tissues were resuspended in Trizol (Invitrogen)  
358 for RNA extraction. Complementary (c) DNA was synthesized by using a qScript cDNA synthesis kit  
359 (Bio-Rad). The sequences of the primer sets for cytokines, SARS-CoV-2 S gene and PCR reaction  
360 conditions were described previously<sup>50-52</sup>. The PCR assay was performed in the CFX96 real-time PCR  
361 system (Bio-Rad). Gene expression was calculated using the formula  $2^{-[C_t(\text{target gene}) - C_t(\beta\text{-actin})]}$  as described  
362 before<sup>53</sup>.

363 **B cell ELISPOT assay:** ELISPOT assays were performed as previously described<sup>54</sup> with some  
364 modifications. Briefly, splenocytes or lung leukocytes were stimulated with 1 µg/ml R848 and 10 ng/ml  
365 recombinant human IL-2 (Mabtech In, OH). Millipore ELISPOT plates (Millipore Ltd, Darmstadt,  
366 Germany) were coated with 100 µl SARS-CoV-2 RBD (RayBiotech, USA, 10 mg/ml) or rSARS-CoV-2  
367 spike protein (R&D Systems). To detect total IgG or IgA expressing B cells, the wells were coated with  
368 100 µL of anti-mouse IgG or IgA capture Ab (Mabtech In). Stimulated cells were harvested, and added in  
369 duplicates to assess total IgG, IgA ASCs, or SARS-CoV-2 specific B cells. The plates were incubated  
370 overnight at 37°C, followed by incubation with biotin-conjugated anti-mouse IgG (Mabtech In) for 2 h at  
371 room temperature, then 100 µL/well streptavidin-ALP was added for 1 h. Plates were developed with  
372 BCIP/NBT-Plus substrate until distinct spots emerge, washed with tap water, and scanned using an  
373 ImmunoSpot 6.0 analyzer and analyzed by ImmunoSpot software (Cellular Technology Ltd).



374 **IFN- $\gamma$  ELISPOT.** Millipore ELISPOT plates (Millipore Ltd) were coated with anti-IFN- $\gamma$  capture Ab  
375 (Cellular Technology Ltd) at 4°C overnight. Splenocytes or lung leukocytes were stimulated in duplicates  
376 with SARS-CoV-2 S peptide pools (2  $\mu$ g/ml, Miltenyi Biotec) for 24 h at 37°C. Cells were stimulated  
377 with anti-CD3 (1  $\mu$ g/ml, e-Biosciences) or medium alone were used as controls. This was followed by  
378 incubation with biotin-conjugated anti-IFN- $\gamma$  (Cellular Technology Ltd) for 2 h at room temperature, and  
379 then alkaline phosphatase-conjugated streptavidin for 30 min. The plates were washed and scanned using  
380 an ImmunoSpot 6.0 analyzer and analyzed by ImmunoSpot software to determine the spot-forming cells  
381 (SFC) per 10<sup>6</sup> splenocytes.

382 **Intracellular cytokine staining (ICS):** Splenocytes or lung leukocytes were incubated with SARS-  
383 CoV-2 S peptide pools (1 $\mu$ g/ml, Miltenyi Biotec) for 24 h. BD GolgiPlug (BD Bioscience) was added to  
384 block protein transport at the final 6 h of incubation. Cells were stained with antibodies for CD3, CD4, or  
385 CD8, fixed in 2% paraformaldehyde, and permeabilized with 0.5% saponin before adding anti-IFN- $\gamma$ , or  
386 control rat IgG1 (e-Biosciences). Samples were processed with a C6 Flow Cytometer instrument. Dead  
387 cells were excluded based on forward and side light scatter. Data were analyzed with a CFlow Plus Flow  
388 Cytometer (BD Biosciences).

389 **Immunofluorescence staining:** SAEC and RPMI2650 cells were seeded in 8-well chamber slides at  
390 a density of 3 x 10<sup>4</sup> cells per well and cultured overnight. Fluorescent vaccine particles were prepared  
391 using Cy5 labeled CpG ODN, and then incubated with cells at the ratio of 10 to 1 between mPSM to cells  
392 for 6 h. After incubation, cells were washed with PBS twice, fixed with 4% paraformaldehyde at room  
393 temperature for 15 min, and permeabilized with 0.1% tween-20 for 15 min. After blocking with 1% BSA  
394 plus 5% FBS, cells were incubated with anti-EEA1 antibody (1:500, Abcam) at 4°C overnight, followed  
395 by staining with AF488 -labeled goat anti-rabbit secondary antibody (1:1000 dilution, ThermoFisher) at  
396 room temperature for 2 h. Finally, nuclei were stained with 0.5  $\mu$ g/mL DAPI for 15 min.

397 **mNG SARS-CoV-2 reporter neutralization assay.** The mNG SARS-CoV-2 reporter neutralization  
398 assay was performed using a previous method<sup>55</sup> with some modifications. Vero CCL-81 cells (1.2  $\times$ 10<sup>4</sup>)  
399 in 50  $\mu$ l of DMEM containing 2% FBS were seeded in each well of black  $\mu$ CLEAR flat-bottom 96-well

400 plate (Greiner Bio-one™). The cells were incubated overnight at 37°C with 5% CO<sub>2</sub>. On the next day,  
401 each serum in duplicate was two-fold serially diluted in DMEM with 2% FBS and incubated with mNG  
402 SARS-CoV-2 at 37°C for 1 h. The virus-serum mixture was transferred to the Vero CCL-81 cell plate  
403 with the final multiplicity of infection (MOI) of 0.5. For each serum, the starting dilution was 1/50 with  
404 nine two-fold dilutions to the final dilution of 1/ 12800. After incubating the infected cells at 37°C for 16-  
405 24 h, 25 µl of Hoechst 33342 Solution (400-fold diluted in Hank's Balanced Salt Solution; Gibco) was  
406 added to each well to stain the cell nucleus. The plate was sealed with Breath-Easy sealing membrane  
407 (Diversified Biotech), incubated at 37°C for 20 min, and quantified for mNG fluorescence on  
408 Cytation™ 7 (BioTek). The raw images (1 picture per well) were acquired using 4 × objective. Infection  
409 rates were determined by dividing the mNG positive cell number by total cell number (indicated by  
410 nucleus staining). Relative infection rates were obtained by normalizing the infection rates of serum-  
411 treated groups to those of non-serum- treated controls. The curves of the relative infection rates versus the  
412 serum dilutions (Log<sub>10</sub> values) were plotted using Prism 8 (GraphPad). A nonlinear regression method  
413 was used to determine the dilution fold that neutralized 50% of mNG fluorescence (NT<sub>50</sub>).

414 **Plaque assay:** Vero E6 cells were seeded on 6-well plates and incubated at 37 °C, 5% CO<sub>2</sub> for 16 h.  
415 Lung tissue homogenates in 0.2 ml volumes were used to infect the cells for 1 h. After the incubation, the  
416 overlay medium containing MEM with 2% FBS, 1% penicillin–streptomycin, and 1.6% agarose was  
417 added to the infected cells. Plates were stained with neutral red (Sigma-Aldrich) and plaques were  
418 counted to calculate viral titers expressed as PFU/ml.

419 **Statistical analysis:** Values for viral load, cytokine production, antibody titers, and T cell response  
420 experiments were compared using Prism software (GraphPad) statistical analysis and were presented as  
421 means ± SEM. *P* values of these experiments were calculated with a non-paired Student's *t* test.

422

423

424

425

426 **Supplementary Methods:**

427 **Serum biochemistry assay:** Serum samples were tested for alanine aminotransferase (ALT), albumin  
428 (ALB), alkaline phosphatase (ALP), amylase (AMY), calcium (CA), creatinine (CRE), globulin (GLOB),  
429 glucose (GLU), phosphorus (PHOS), potassium (K<sup>+</sup>), Sodium (NA<sup>+</sup>), total bilirubin (TBIL), total protein  
430 (TP), and urea nitrogen (BUN) Biochemistry Panel Plus analyzer discs (Abaxis).

431

432

433

434 **ACKNOWLEDGEMENTS**

435 This work was supported in part by NIH grants R01AI127744 (T.W.), R01 AI116812 (to X.B),  
436 R21AG069226 (X.B), U54CA210181 (H.S.), a Fast Grant from Emergent Ventures at the Mercatus  
437 Center (T.W.), and a Pilot Grant from the Institute for Human Infections &Immunity (IHII) at UTMB  
438 (X.B.). We thank Gang Li for technical assistance on the cloning of RBD protein and Dr. Linsey Yeager  
439 for assisting in manuscript preparation.

440

441 **COMPETING INTERESTS**

442 The authors declare that there are no competing interests.

443

444 **AUTHOR CONTRIBUTIONS**

445 A.A., Q.S., B.W., J.Z., J.M., S.R.O., and W.W. performed the experiments. X.B., P.Y.S., H.S., and  
446 T.W., designed the experiment. X.X., P.Y.S., and P.V.A. provided critical reagents, A.A., Q.S., J.Z., J.M.,  
447 and T.W. analyzed the data. T.W. wrote the initial draft of the manuscript and other coauthors provided  
448 editorial comments.

449

450

451

452 **REFERENCES:**

- 453 1 Wu, A. *et al.* Genome Composition and Divergence of the Novel Coronavirus (2019-nCoV)  
454 Originating in China. *Cell Host Microbe* **27**, 325-328, doi:10.1016/j.chom.2020.02.001 (2020).
- 455 2 Yang, Y. & Du, L. SARS-CoV-2 spike protein: a key target for eliciting persistent neutralizing  
456 antibodies. *Signal Transduct Target Ther* **6**, 95, doi:10.1038/s41392-021-00523-5 (2021).
- 457 3 Li, C. K. *et al.* T cell responses to whole SARS coronavirus in humans. *J Immunol* **181**, 5490-  
458 5500, doi:10.4049/jimmunol.181.8.5490 (2008).
- 459 4 Dai, L. & Gao, G. F. Viral targets for vaccines against COVID-19. *Nat Rev Immunol* **21**, 73-82,  
460 doi:10.1038/s41577-020-00480-0 (2021).
- 461 5 Gao, Q. *et al.* Development of an inactivated vaccine candidate for SARS-CoV-2. *Science* **369**,  
462 77-81, doi:10.1126/science.abc1932 (2020).
- 463 6 Hassan, A. O. *et al.* A Single-Dose Intranasal ChAd Vaccine Protects Upper and Lower  
464 Respiratory Tracts against SARS-CoV-2. *Cell* **183**, 169-184 e113, doi:10.1016/j.cell.2020.08.026  
465 (2020).
- 466 7 Smith, T. R. F. *et al.* Immunogenicity of a DNA vaccine candidate for COVID-19. *Nat Commun*  
467 **11**, 2601, doi:10.1038/s41467-020-16505-0 (2020).
- 468 8 Walsh, E. E. *et al.* Safety and Immunogenicity of Two RNA-Based Covid-19 Vaccine  
469 Candidates. *N Engl J Med* **383**, 2439-2450, doi:10.1056/NEJMoa2027906 (2020).
- 470 9 Wang, Y. *et al.* Scalable live-attenuated SARS-CoV-2 vaccine candidate demonstrates preclinical  
471 safety and efficacy. *Proc Natl Acad Sci U S A* **118**, doi:10.1073/pnas.2102775118 (2021).
- 472 10 Parums, V. Editorial: Revised World Health Organization (WHO) Terminology for Variants of  
473 Concern and Variants of Interest of SARS-CoV-2. *Med Sci Monit* **27**, e933622,  
474 doi:10.12659/MSM.933622 (2021).
- 475 11 Plante, J. A. *et al.* The variant gambit: COVID-19's next move. *Cell Host Microbe* **29**, 508-515,  
476 doi:10.1016/j.chom.2021.02.020 (2021).
- 477 12 Liu, L. *et al.* Anti-spike IgG causes severe acute lung injury by skewing macrophage responses  
478 during acute SARS-CoV infection. *JCI Insight* **4**, doi:10.1172/jci.insight.123158 (2019).
- 479 13 Mahmoodpoor, A., Sanaie, S., Samadi, P., Yousefi, M. & Nader, N. D. SARS-CoV-2: Unique  
480 Challenges of the Virus and Vaccines. *Immunol Invest* **50**, 802-809,  
481 doi:10.1080/08820139.2021.1936009 (2021).
- 482 14 Xia, X. *et al.* Porous silicon microparticle potentiates anti-tumor immunity by enhancing cross-  
483 presentation and inducing type I interferon response. *Cell Rep* **11**, 957-966,  
484 doi:10.1016/j.celrep.2015.04.009 (2015).
- 485 15 Mai, J. *et al.* Synergistic Activation of Antitumor Immunity by a Particulate Therapeutic Vaccine.  
486 *Adv Sci (Weinh)* **8**, 2100166, doi:10.1002/advs.202100166 (2021).
- 487 16 Rostamian, M., Sohrabi, S., Kavosifard, H. & Niknam, H. M. Lower levels of IgG1 in  
488 comparison with IgG2a are associated with protective immunity against *Leishmania tropica*  
489 infection in BALB/c mice. *J Microbiol Immunol Infect* **50**, 160-166,  
490 doi:10.1016/j.jmii.2015.05.007 (2017).
- 491 17 Muruato, A. *et al.* Mouse-adapted SARS-CoV-2 protects animals from lethal SARS-CoV  
492 challenge. *PLoS Biol* **19**, e3001284, doi:10.1371/journal.pbio.3001284 (2021).
- 493 18 Melenotte, C. *et al.* Immune responses during COVID-19 infection. *Oncoimmunology* **9**,  
494 1807836, doi:10.1080/2162402X.2020.1807836 (2020).
- 495 19 Teijaro, J. R. & Farber, D. L. COVID-19 vaccines: modes of immune activation and future  
496 challenges. *Nat Rev Immunol* **21**, 195-197, doi:10.1038/s41577-021-00526-x (2021).
- 497 20 Lin, Q., Zhu, L., Ni, Z., Meng, H. & You, L. Duration of serum neutralizing antibodies for  
498 SARS-CoV-2: Lessons from SARS-CoV infection. *J Microbiol Immunol Infect* **53**, 821-822,  
499 doi:10.1016/j.jmii.2020.03.015 (2020).
- 500 21 Whitman, J. D. *et al.* Evaluation of SARS-CoV-2 serology assays reveals a range of test  
501 performance. *Nat Biotechnol* **38**, 1174-1183, doi:10.1038/s41587-020-0659-0 (2020).

- 502 22 Chen, J. *et al.* Cellular immune responses to severe acute respiratory syndrome coronavirus  
503 (SARS-CoV) infection in senescent BALB/c mice: CD4<sup>+</sup> T cells are important in control of  
504 SARS-CoV infection. *J Virol* **84**, 1289-1301, doi:10.1128/JVI.01281-09 (2010).
- 505 23 Li, T. *et al.* Significant changes of peripheral T lymphocyte subsets in patients with severe acute  
506 respiratory syndrome. *J Infect Dis* **189**, 648-651, doi:10.1086/381535 (2004).
- 507 24 Zhao, J., Zhao, J. & Perlman, S. T cell responses are required for protection from clinical disease  
508 and for virus clearance in severe acute respiratory syndrome coronavirus-infected mice. *J Virol*  
509 **84**, 9318-9325, doi:10.1128/JVI.01049-10 (2010).
- 510 25 Chen, G. *et al.* Clinical and immunological features of severe and moderate coronavirus disease  
511 2019. *The Journal of clinical investigation*, doi:10.1172/JCI137244 (2020).
- 512 26 Graham, B. S. Rapid COVID-19 vaccine development. *Science* **368**, 945-946,  
513 doi:10.1126/science.abb8923 (2020).
- 514 27 Alving, C. R., Peachman, K. K., Rao, M. & Reed, S. G. Adjuvants for human vaccines. *Curr*  
515 *Opin Immunol* **24**, 310-315, doi:10.1016/j.coi.2012.03.008 (2012).
- 516 28 Bolhassani, A. & Rafati, S. Mini-chaperones: Potential immuno-stimulators in vaccine design.  
517 *Hum Vaccin Immunother* **9**, doi:22248 [pii] (2012).
- 518 29 Worzner, K. *et al.* Adjuvanted SARS-CoV-2 spike protein elicits neutralizing antibodies and CD4  
519 T cell responses after a single immunization in mice. *EBioMedicine* **63**, 103197,  
520 doi:10.1016/j.ebiom.2020.103197 (2021).
- 521 30 Routhu, N. K. *et al.* SARS-CoV-2 RBD trimer protein adjuvanted with Alum-3M-052 protects  
522 from SARS-CoV-2 infection and immune pathology in the lung. *Nat Commun* **12**, 3587,  
523 doi:10.1038/s41467-021-23942-y (2021).
- 524 31 Arunachalam, P. S. *et al.* Adjuvanting a subunit COVID-19 vaccine to induce protective  
525 immunity. *Nature* **594**, 253-258, doi:10.1038/s41586-021-03530-2 (2021).
- 526 32 Xu, R. *et al.* Multistage vectored siRNA targeting ataxia-telangiectasia mutated for breast cancer  
527 therapy. *Small* **9**, 1799-1808, doi:10.1002/smll.201201510 (2013).
- 528 33 Shen, H. *et al.* Enhancing chemotherapy response with sustained EphA2 silencing using  
529 multistage vector delivery. *Clin Cancer Res* **19**, 1806-1815, doi:10.1158/1078-0432.CCR-12-  
530 2764 (2013).
- 531 34 Lund, F. E. & Randall, T. D. Scent of a vaccine. *Science* **373**, 397-399,  
532 doi:10.1126/science.abg9857 (2021).
- 533 35 Du, L. *et al.* Intranasal vaccination of recombinant adeno-associated virus encoding receptor-  
534 binding domain of severe acute respiratory syndrome coronavirus (SARS-CoV) spike protein  
535 induces strong mucosal immune responses and provides long-term protection against SARS-CoV  
536 infection. *J Immunol* **180**, 948-956, doi:10.4049/jimmunol.180.2.948 (2008).
- 537 36 Kim, S., Jang, J. E., Yu, J. R. & Chang, J. Single mucosal immunization of recombinant  
538 adenovirus-based vaccine expressing F1 protein fragment induces protective mucosal immunity  
539 against respiratory syncytial virus infection. *Vaccine* **28**, 3801-3808,  
540 doi:10.1016/j.vaccine.2010.03.032 (2010).
- 541 37 Yusuf, H. & Kett, V. Current prospects and future challenges for nasal vaccine delivery. *Hum*  
542 *Vaccin Immunother* **13**, 34-45, doi:10.1080/21645515.2016.1239668 (2017).
- 543 38 Wang, Z. *et al.* Enhanced SARS-CoV-2 neutralization by dimeric IgA. *Sci Transl Med* **13**,  
544 doi:10.1126/scitranslmed.abf1555 (2021).
- 545 39 Park, J. H. & Lee, H. K. Delivery Routes for COVID-19 Vaccines. *Vaccines (Basel)* **9**,  
546 doi:10.3390/vaccines9050524 (2021).
- 547 40 Du, Y. *et al.* Intranasal administration of a recombinant RBD vaccine induced protective  
548 immunity against SARS-CoV-2 in mouse. *Vaccine* **39**, 2280-2287,  
549 doi:10.1016/j.vaccine.2021.03.006 (2021).
- 550 41 Kiyono, H. & Fukuyama, S. NALT- versus Peyer's-patch-mediated mucosal immunity. *Nat Rev*  
551 *Immunol* **4**, 699-710, doi:10.1038/nri1439 (2004).

- 552 42 Al-Halifa, S., Gauthier, L., Arpin, D., Bourgault, S. & Archambault, D. Nanoparticle-Based  
553 Vaccines Against Respiratory Viruses. *Front Immunol* **10**, 22, doi:10.3389/fimmu.2019.00022  
554 (2019).
- 555 43 Schneider, C. S. *et al.* Nanoparticles that do not adhere to mucus provide uniform and long-  
556 lasting drug delivery to airways following inhalation. *Sci Adv* **3**, e1601556,  
557 doi:10.1126/sciadv.1601556 (2017).
- 558 44 Shin, H. & Iwasaki, A. A vaccine strategy that protects against genital herpes by establishing  
559 local memory T cells. *Nature* **491**, 463-467, doi:10.1038/nature11522 (2012).
- 560 45 Wu, B. *et al.* Sequencing on an imported case in China of COVID-19 Delta variant emerging  
561 from India in a cargo ship in Zhoushan, China. *J Med Virol* **93**, 6828-6832,  
562 doi:10.1002/jmv.27239 (2021).
- 563 46 Liu, Y. *et al.* Neutralizing Activity of BNT162b2-Elicited Serum. *N Engl J Med* **384**, 1466-1468,  
564 doi:10.1056/NEJMc2102017 (2021).
- 565 47 Liu, J. *et al.* BNT162b2-elicited neutralization of B.1.617 and other SARS-CoV-2 variants.  
566 *Nature* **596**, 273-275, doi:10.1038/s41586-021-03693-y (2021).
- 567 48 Kim, H. W. *et al.* Respiratory syncytial virus disease in infants despite prior administration of  
568 antigenic inactivated vaccine. *Am J Epidemiol* **89**, 422-434,  
569 doi:10.1093/oxfordjournals.aje.a120955 (1969).
- 570 49 Mahmoodpoor, A., Sanaie, S., Samadi, P., Yousefi, M. & Nader, N. D. SARS-CoV-2: Unique  
571 Challenges of the Virus and Vaccines. *Immunol Invest*, 1-8, doi:10.1080/08820139.2021.1936009  
572 (2021).
- 573 50 Chan, J. F. *et al.* A familial cluster of pneumonia associated with the 2019 novel coronavirus  
574 indicating person-to-person transmission: a study of a family cluster. *Lancet* **395**, 514-523,  
575 doi:10.1016/S0140-6736(20)30154-9 (2020).
- 576 51 Wang, T. *et al.* Toll-like receptor 3 mediates West Nile virus entry into the brain causing lethal  
577 encephalitis. *Nat Med* **10**, 1366-1373, doi:10.1038/nm1140 (2004).
- 578 52 Xie, G. *et al.* Dysregulation of Toll-Like Receptor 7 Compromises Innate and Adaptive T Cell  
579 Responses and Host Resistance to an Attenuated West Nile Virus Infection in Old Mice. *J Virol*  
580 **90**, 1333-1344, doi:10.1128/JVI.02488-15 (2016).
- 581 53 Welte, T. *et al.* Vgamma4+ T cells regulate host immune response to West Nile virus infection.  
582 *FEMS Immunol Med Microbiol* **63**, 183-192, doi:10.1111/j.1574-695X.2011.00840.x (2011).
- 583 54 Adam, A. *et al.* Multiplexed FluoroSpot for the Analysis of Dengue Virus- and Zika Virus-  
584 Specific and Cross-Reactive Memory B Cells. *J Immunol* **201**, 3804-3814,  
585 doi:10.4049/jimmunol.1800892 (2018).
- 586 55 Muruato, A. E. *et al.* A high-throughput neutralizing antibody assay for COVID-19 diagnosis and  
587 vaccine evaluation. *Nat Commun* **11**, 4059, doi:10.1038/s41467-020-17892-0 (2020).
- 588

589



590 **FIGURE LEGENDS**

591 **Figure 1. mPSM serves a potent adjuvant for SARS-CoV-2 RBD vaccine to generate SARS-**  
592 **CoV-2 specific antibodies in mice following parenteral vaccination. A.** Schematic of SARS-CoV-2  
593 RBD construct. **B.** Coomassie blue staining of purified recombinant (r)RBD protein. Lane 1: protein  
594 molecular weight marker. **C-D.** Cytokine production and activation of cell surface CD86 expression in  
595 BMDCs treated with mPSM-RBD and controls. **C.** Levels of IL-6, IL-12p70 and TNF- $\alpha$  in cell culture  
596 supernatant were determined by ELISA 24 h after the treatment. n = 3. **D.** CD86 expression was  
597 measured by flow cytometry analysis. One representative image was shown. **E.** ACE2 competition assay.  
598 Sera of mice-vaccinated with mPSM-RBD, alum-RBD, RBD, and mock were collected at 1 month post  
599 vaccination to measure the inhibitory effects on RBD binding to its receptor ACE2. n= 3-4. **F.** Endpoint  
600 IgG subtypes titers against SARS-CoV-2 RBD measured in sera collected 1 month post parenteral prime  
601 (day 0) and boost (day 14) vaccination. n =4. **G.** Endpoint IgG subtype titers against SARS-CoV-2 RBD  
602 measured in sera of mice following prime (day 0) and boost (day 14) vaccination with different doses of  
603 r-RBD- formulated with mPSM. n =3. \*\*  $P < 0.01$  compared to mock group. ##  $P < 0.01$  compared to  
604 alum-RBD group.

605 **Figure 2. mPSM-RBD induced SARS-CoV-2 specific immune responses in BALB/c mice at**  
606 **one month post parenteral vaccination. A.** Study design and vaccination timeline. **B.** Endpoint IgG  
607 subtype titers against SARS-CoV-2 r-RBD measured in serum collected from the vaccinated mice. n= 5.  
608 **C-D.** SARS-CoV-2 specific memory B cell (MBC) responses by ELISPOT analysis. **C.** Images of wells  
609 from MBC culture. Splenocytes were stimulated *in vitro* for 7 d with R848 plus rIL-2 and seeded onto  
610 ELISPOT plates coated with Ig capture Ab or SARS-CoV-2 RBD. Images of total IgG-antibody secreting  
611 cells (ASC), RBD-specific MBCs, and negative control (NC) wells are shown. **D.** Frequencies of SARS-  
612 CoV-2 RBD-specific ASCs per  $10^6$  input cells in MBC cultures from the subject. n= 4. **E-F.** ELISPOT  
613 quantification of vaccine-specific T cells. Mouse splenocytes were *ex vivo* stimulated with overlapping  
614 peptide pools spanning SARS-CoV-2 S protein,  $\alpha$ -CD3, or blank (negative control, NC) for 20 h. **E.**



615 Images of wells from T cell culture. **F.** Spot forming cells (SFC) were measured by IFN- $\gamma$  ELISPOT.  
616 Data are shown as # of SFC per  $10^6$  splenocytes.  $n=5$ . \*\*  $P < 0.01$  or \* $P < 0.05$  compared to mock  
617 group. ## $P < 0.01$  compared to alum- RBD group.

618 **Figure 3. mPSM-RBD induced durable Type 1 prone protective immunity in mice.** Six-  
619 week-old BALB/c mice were prime-boost immunized with mock (PBS), alum-RBD, or mPSM-RBD via  
620 i.d. route. **A.** Study design and vaccination timeline. **B-D.** Endpoint IgG subtype titers against SARS-  
621 CoV-2 r-RBD measured in serum collected at various time points after vaccination.  $n = 4$ . **E.** Serum  
622 SARS-CoV-2 neutralizing activity measured by plaque reduction neutralization test (PRNT). PRNT<sub>80</sub>  
623 titers are shown,  $n = 4$  or 6. **F-H.** SARS-CoV-2 specific memory B cell (MBC) responses by ELISPOT  
624 analysis at 7 months post vaccination. **F.** Images of wells from MBC culture. Frequencies of spike (**G**) or  
625 RBD (**H**) specific ASCs per  $10^6$  input cells in MBC cultures from the subject. **I-J.** ELISPOT  
626 quantification of vaccine-specific splenic T cells at 7 months post vaccination. Mouse splenocytes were  
627 *ex vivo* stimulated with overlapping peptide pools spanning SARS-CoV-2 S protein,  $\alpha$ -CD3, or blank for  
628 20 h. **I.** Images of wells from T cell culture. **J.** Spot forming cells (SFC) were measured by IFN- $\gamma$   
629 ELISpot. Data are shown as # of SFC per  $10^6$  splenocytes.  $n=4$ . \*\*  $P < 0.01$  compared to the mock  
630 group. ## $P < 0.01$  compared to alum-RBD group.

631 **Figure 4. The protective efficacy of mPSM-RBD vaccine against SARS-CoV-2 and the Beta**  
632 **variant infection following single or two dose parenteral vaccination.** **A-H.** Six- to eight-week-old  
633 BALB/c mice ( $n=5$ ) were prime-boost immunized with mock (PBS), alum-RBD, or mPSM-RBD. At 4.5  
634 months post vaccination, all mice were i.n. challenged with  $2 \times 10^4$  PFU mouse-adapted SARS-CoV-2  
635 CMA4. At day 4 post infection (pi), lung tissues were collected. (**A-B**) SARS-CoV-2 viral titers in lung  
636 tissues were measured by plaque (**A**) and Q-PCR (**B**) assays. **C-H.** Measurement of cytokine and  
637 chemokine levels in lung tissues by Q-PCR assays at day 4 post infection. Data are presented as the fold  
638 increase compared to naïve mice (means  $\pm$  SEM). **I-J.** Six-week-old K18 ACE2 mice ( $n=5$ ) were  
639 immunized once i.p. with mock (PBS), alum-RBD, or mPSM-RBD (25 ug). One month post vaccination,

640 all mice were i.n. challenged with 4000 PFU SARS-CoV-2 Beta variant and lung tissues were collected  
641 at day 4 pi. **I.** Study design and timeline for vaccination and viral challenge. **J.** SARS-CoV-2 viral titers  
642 in lung tissues were measured by plaque assay. \*\*  $P < 0.01$  or \* $P < 0.05$  compared to mock group. # $P <$   
643 0.05 compared to alum-RBD group.

644 **Figure 5. Parenteral and mucosal prime-boost vaccination promotes strong SARS-CoV-2**  
645 **specific mucosal immune responses.** **(A)** Fluorescence microscopic analysis on time-dependent uptake  
646 of vaccine particles in human small airway epithelial cells (SAE) and human nasal cell line RPMI2650.  
647 SAE cells and RPMI2650 cells were incubated with Cy5-labeled vaccine particles (red) for 0.5 h, 1 h, 2h  
648 and 6 h, respectively. Cells were then washed and stained with an anti-EEA1 antibody for early  
649 endosomes (green) and DAPI for nuclei (blue). Bar indicates 10  $\mu\text{m}$ . **(B)** Study design and timeline for  
650 vaccination and viral challenge. Three groups of 6-8-week-old BALB/c or K18 ACE2 mice (n=5) were  
651 prime-boost immunized with mock (PBS), alum-RBD, or mPSM-RBD (5ug). At day 31 post vaccination,  
652 all mice were i.n. challenged with  $1 \times 10^4$  PFU SARS-CoV-2 Delta variant. Four days after viral  
653 challenge, lung tissues were collected. **C-J.** Immunogenicity studies 1 month post vaccination in BALB/c  
654 mice. **C.** ELISPOT quantification of vaccine-specific lung T cells at 1 month post vaccination. Lung  
655 leukocytes were *ex vivo* stimulated with overlapping peptide pools spanning SARS-CoV-2 S protein,  $\alpha$ -  
656 CD3, or blank for 20 h. Top panel. Images of wells from T cell culture. Lower panel. Spot forming cells  
657 (SFC) were measured by IFN- $\gamma$  ELISPOT. Data are shown as # of SFC per  $10^6$  cells. n= 3- 4. **D-E.** Lung  
658 leukocytes were cultured *ex vivo* with S peptide pools for 5 h, and stained for IFN- $\gamma$ , CD3, and CD4 or  
659 CD8. Total T cells were gated. Total number of IFN- $\gamma^+$  CD4 $^+$  and CD8 $^+$  T cell subsets is shown. **F.**  
660 Lung leukocytes were stimulated *in vitro* for 7 days with R848 plus rIL-2 and seeded onto ELISPOT  
661 plates coated with SARS-CoV-2 RBD. Frequencies of SARS-CoV-2 RBD specific IgA secreting lung B  
662 cells per  $10^6$  input cells in MBC cultures from the subject. n= 3- 4. **G-I.** IgA titers in BAL (**G**) and IgG1,  
663 and IG2a subtypes in sera (**H-I**). \*\*  $P < 0.01$  or \* $P < 0.05$  compared to mock group. # $P < 0.05$  compared  
664 to alum-RBD group.

665           **Figure 6. The protective efficacy of parenteral and mucosal prime-boost vaccination against**  
666 **SARS-CoV-2 Delta variant infection.** As described in Fig. 5B, three groups of 6-8-week-old K18 ACE2  
667 mice (n=5) were prime-boost immunized with mock (PBS), alum-RBD, or mPSM-RBD (5 $\mu$ g). At day 31  
668 post vaccination, all mice were i.n. challenged with 1 x10<sup>4</sup> PFU SARS-CoV-2 Delta variant. Four days  
669 after viral challenge, lung tissues were collected. (A) SARS-CoV-2 viral titers in lung tissues were  
670 measured by plaque (A) and Q-PCR (B) assays. C-G. Measurement of cytokine and chemokine levels in  
671 lung tissues by Q-PCR assays at day 4 post infection. Data are presented as the fold increase compared to  
672 naïve mice (means  $\pm$  SEM). n= 5. \*\*  $P < 0.01$  or \* $P < 0.05$  compared to mock group. # $P < 0.05$  compared  
673 to alum-RBD group.  
674

675 **SUPPLEMENTARY FIGURE LEGENDS**

676 **Supplementary Figure 1. mPSM serves as a potent but safe adjuvant for SARS-CoV-2**

677 **RBD vaccine. A.** Activation of cell surface CD80 expression in BMDCs 24 h after treatment with

678 mPSM-RBD, Alum-RBD, RBD or mock. CD80 expression was measured by flow cytometry analysis.

679 One representative image was shown. **B-H.** The pathogenic effects of mPSM-RBD in mice. Six- to eight-

680 week-old female BALB/c mice (n =5) were i.p. inoculated with mPSM-RBD (5 µg) or PBS (mock). Sera

681 were collected at 24 h post-vaccination for analysis using Biochemistry Panel Plus analyzer discs (**B-E**,

682 Abaxis) or proinflammatory cytokine levels by Q-PCR (**F-H**). Data are presented as the fold increase

683 compared to naïve mice (means ± SEM). n= 5.

684 **Supplementary Figure 2. mPSM-RBD induces SARS-CoV-2 specific immune responses in**

685 **C57BL/6 mice one month post parenteral vaccination. A-B.** Endpoint IgG subtype titers against

686 SARS-CoV-2 rRBD measured in serum collected from vaccinated mice. n= 5. **C-D.** SARS-CoV-2

687 specific memory B cell (MBC) responses by ELISPOT analysis. **C.** Images of wells from MBC culture.

688 Splenocytes were stimulated *in vitro* for 7 d with R848 plus rIL-2 and seeded onto ELISPOT plates

689 coated with Ig capture Ab or SARS-CoV-2 RBD. Images of total ASCs, RBD specific MBCs, and

690 negative control (NC) wells are shown. **D.** Frequencies of SARS-CoV-2 RBD specific ASCs per 10<sup>6</sup>

691 input cells in MBC cultures from the subject. n= 4. **E-F.** ELISPOT quantification of vaccine-specific T

692 cells. Mouse splenocytes were *ex vivo* stimulated with overlapping peptide pools spanning SARS-CoV-2

693 S protein, α-CD3, or blank (NC) for 20 hours. **E.** Images of wells from T cell culture. **F.** Spot forming

694 cells (SFC) were measured by IFN-γ ELISPOT. Data are shown as # of SFC per 10<sup>6</sup> splenocytes. n= 4.

695 \*\*  $P < 0.01$  compared to mock group.  $^{##}P < 0.01$  compared to alum- RBD group.

696 **Supplementary Figure 3. mPSM-RBD induces durable Type 1 prone immune responses**

697 **following parenteral vaccination. A-B.** IgG responses 4.5 months after vaccination. Six-week-old

698 BALB/c mice were prime-boost immunized with mock (PBS), alum-RBD, or mPSM-RBD via i.p. route.

699 **A.** O.D. values by ELISA. **C-D.** SARS-CoV-2 specific IgA expressing memory B cell (MBC) responses

700 by ELISPOT analysis at 7 months post vaccination. **C.** Images of wells from MBC culture. Frequencies  
701 of RBD (**D**) specific ASCs per  $10^6$  input cells in MBC cultures from the subject. \*\*  $P < 0.01$  or \* $P < 0.05$   
702 compared to mock group. ## $P < 0.01$  compared to alum- RBD group.

703 **Supplementary Figure 4. The protective efficacy of mPSM-RBD vaccine against SARS-**  
704 **CoV-2 infection one month after parenteral vaccination.** Six- to eight-week-old BALB/c mice (n =5)  
705 were prime-boost immunized with mock (PBS), alum-RBD, or mPSM-RBD. One month post  
706 vaccination, all mice were i.n. challenged with  $2 \times 10^4$  PFU mouse-adapted SARS-CoV-2 CMA4. At day  
707 2 post infection (pi), lung tissues were collected. **A.** Study design and vaccination timeline. **B.** SARS-  
708 CoV-2 viral titers in lung tissues were measured by Q-PCR assay. **C-E.** Measurement of chemokine  
709 levels in lung tissues by Q-PCR assays at day 2 post infection. Data are presented as the fold increase  
710 compared to naïve mice (means  $\pm$  SEM). \*\*  $P < 0.01$  or \* $P < 0.05$  compared to mock group.

711 **Supplementary Figure 5. Parenteral and mucosal prime-boost vaccination induced strong**  
712 **SARS-CoV-2 specific systemic immune responses.** Three groups of 6-8-week-old BALB/c were i.p.  
713 and i.n. prime-boost immunized with mock (PBS), alum-RBD, or mPSM-RBD (5ug). At day 31 post  
714 vaccination, blood and spleen tissues were collected for immunogenicity studies. **A.** ELISPOT  
715 quantification of vaccine-specific splenic T cells at 1 month post vaccination. Splenocytes were *ex vivo*  
716 stimulated with overlapping peptide pools spanning SARS-CoV-2 S protein,  $\alpha$ -CD3, or blank for 20 h.  
717 Top panel. Images of wells from T cell culture. Lower panel. Spot forming cells (SFC) were measured by  
718 IFN- $\gamma$  ELISPOT. Data are shown as # of SFC per  $10^6$  cells. n= 3- 4. **B.** Splenocytes were cultured *ex vivo*  
719 with S peptide pools for 5 h, and stained for IFN- $\gamma$ , CD3, and CD4 or CD8. Total T cells were gated.  
720 Total number of IFN- $\gamma^+$  CD4 $^+$  and CD8 $^+$  T cell subsets is shown. **C.** Splenocytes were stimulated *in vitro*  
721 for 7 d with R848 plus rIL-2 and seeded onto ELISPOT plates coated with SARS-CoV-2 RBD.  
722 Frequencies of SARS-CoV-2 RBD specific IgA secreting splenic B cells per  $10^6$  input cells in MBC  
723 cultures from the subject. n= 3- 4. **D.** IgA response in sera (**I-J**). \*\*  $P < 0.01$  or \* $P < 0.05$  compared to  
724 mock group. ## $P < 0.01$  or # $P < 0.05$  compared to alum-RBD group.

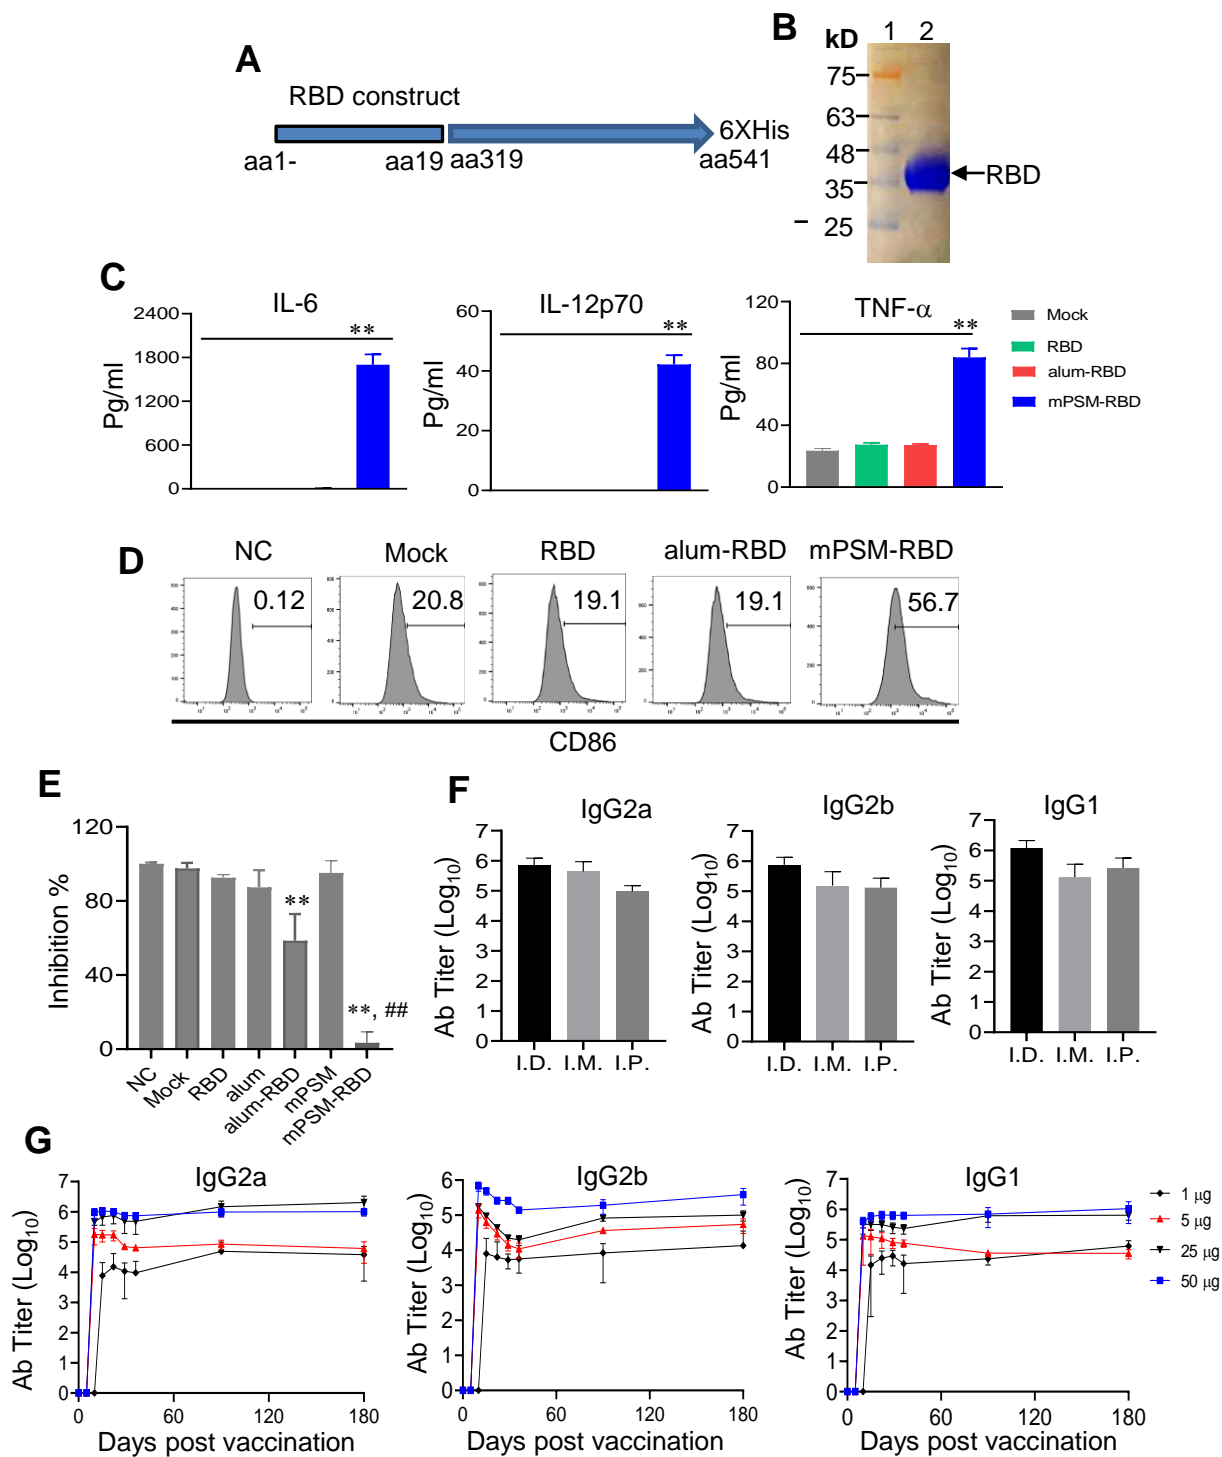

Figure 1

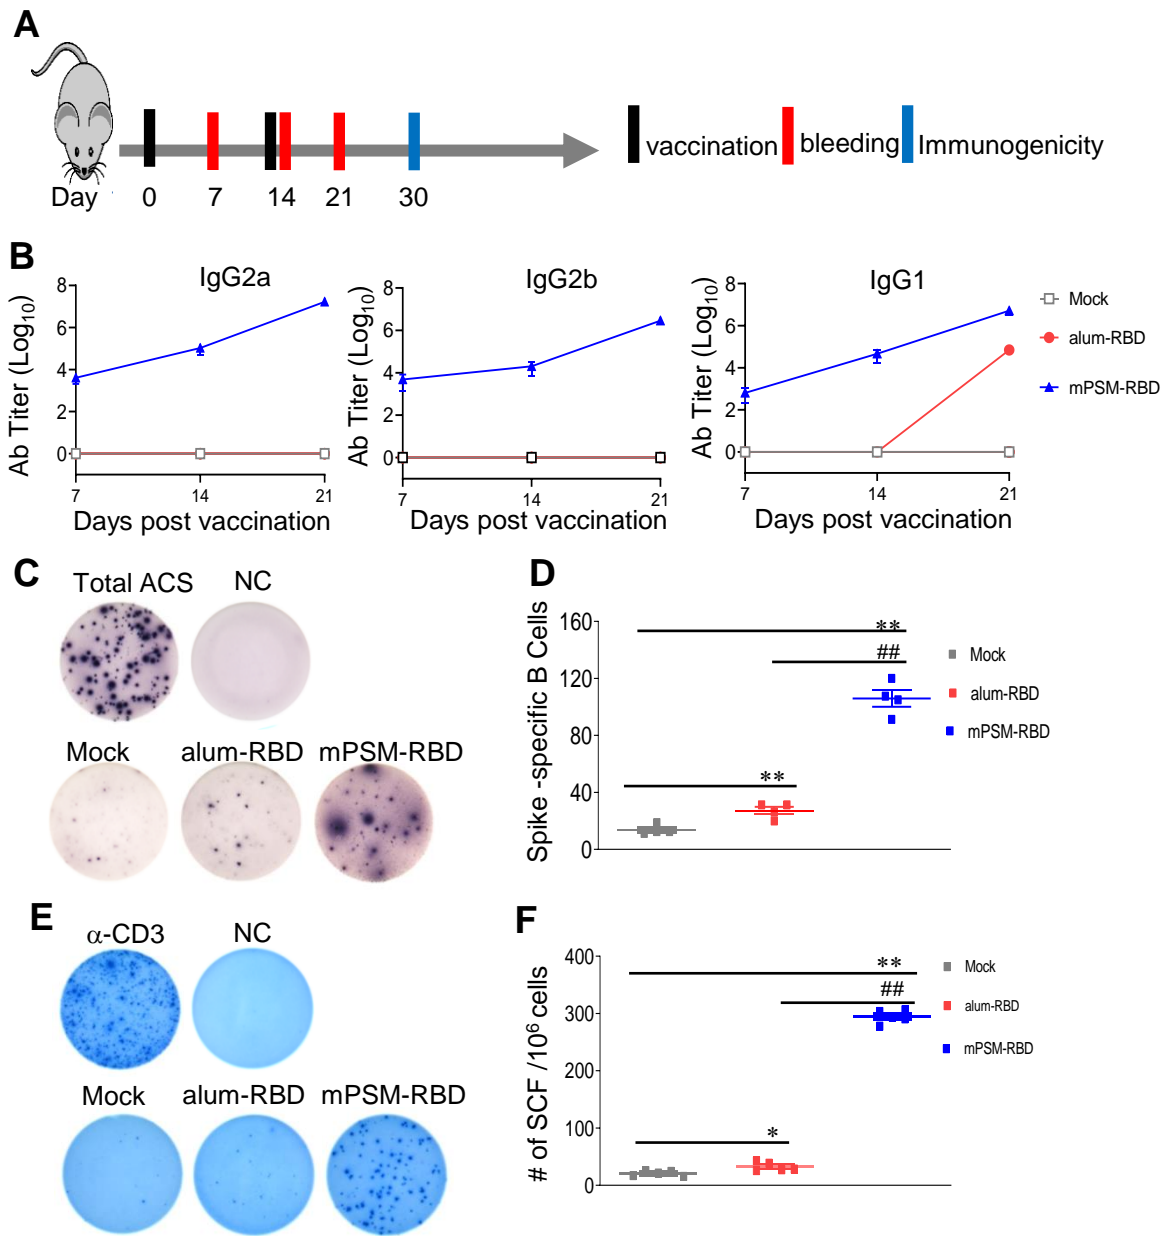

**Figure 2**

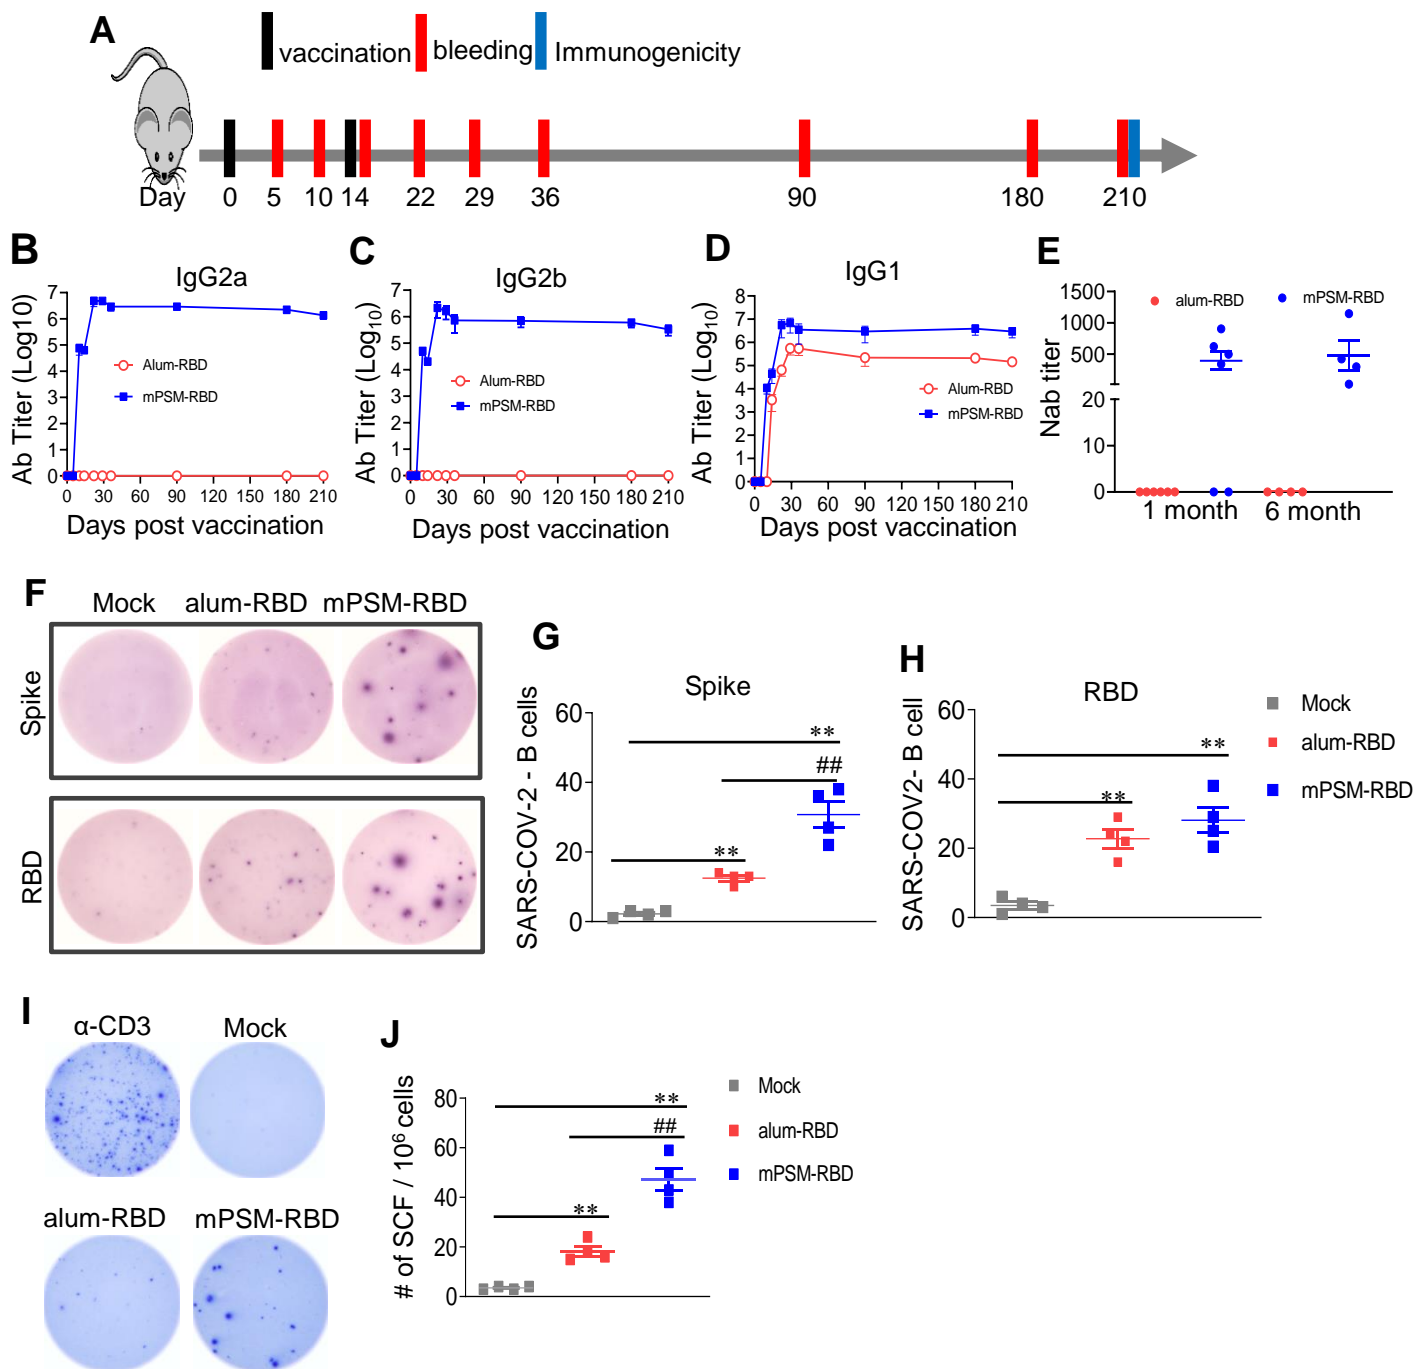

**Figure 3**



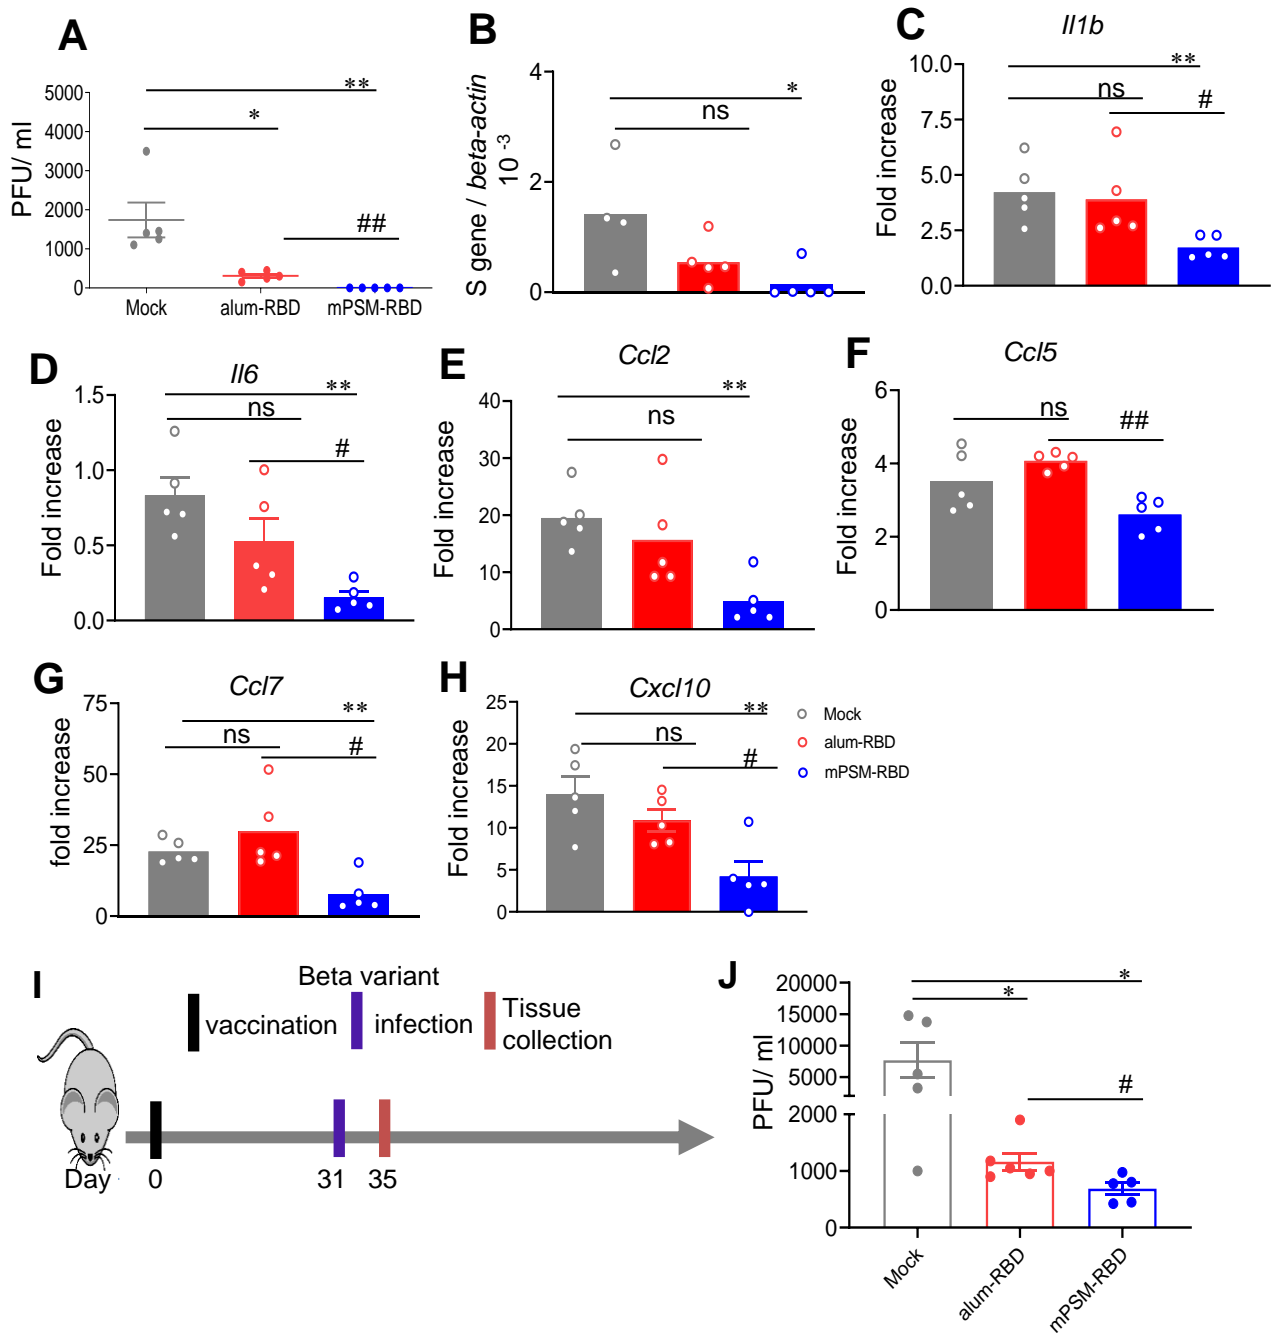

**Figure 4**

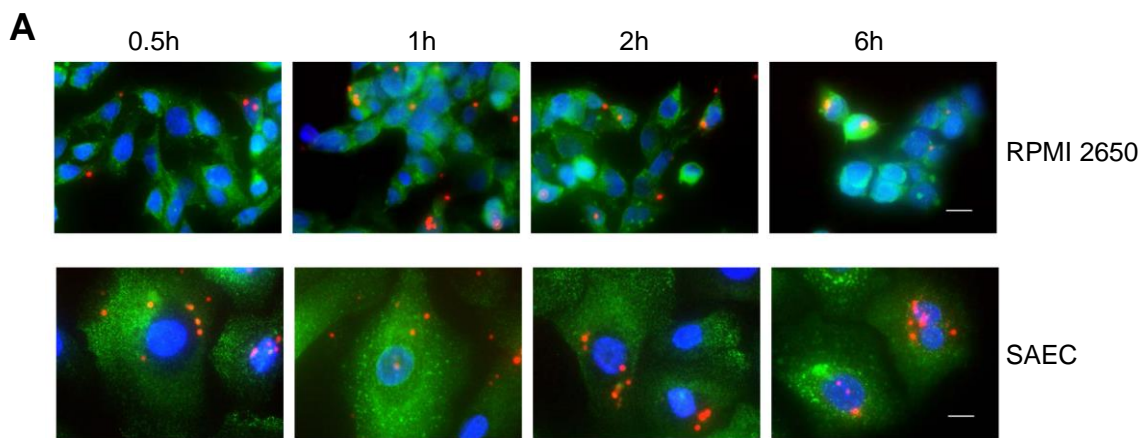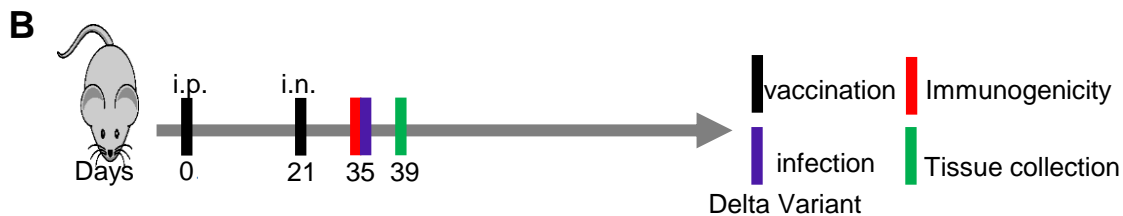

**C** Mock alum-RBD mPSM-RBD

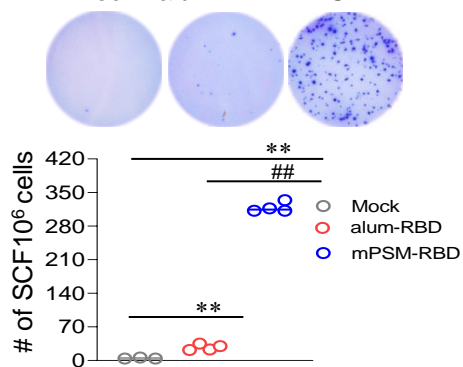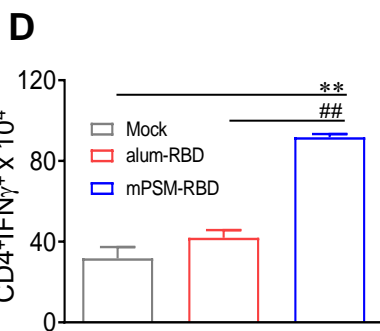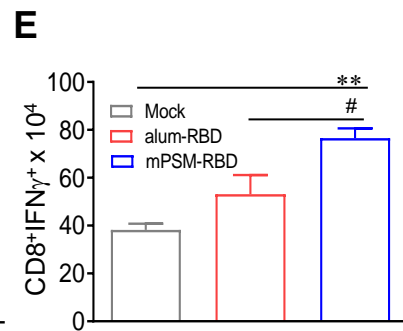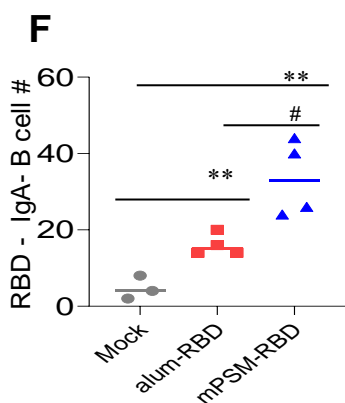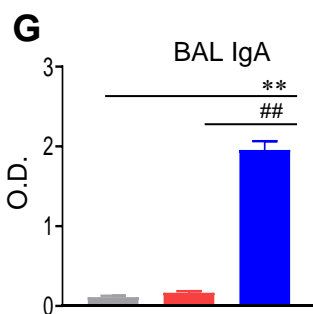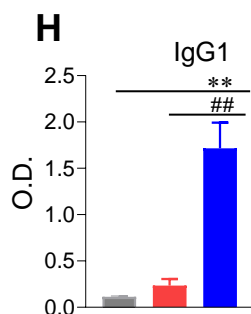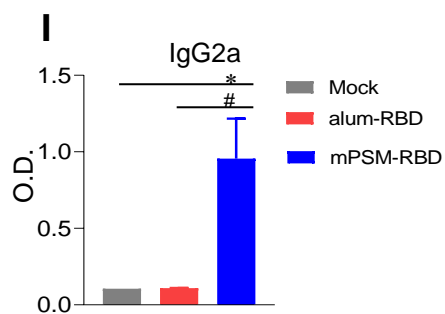

**Figure 5**

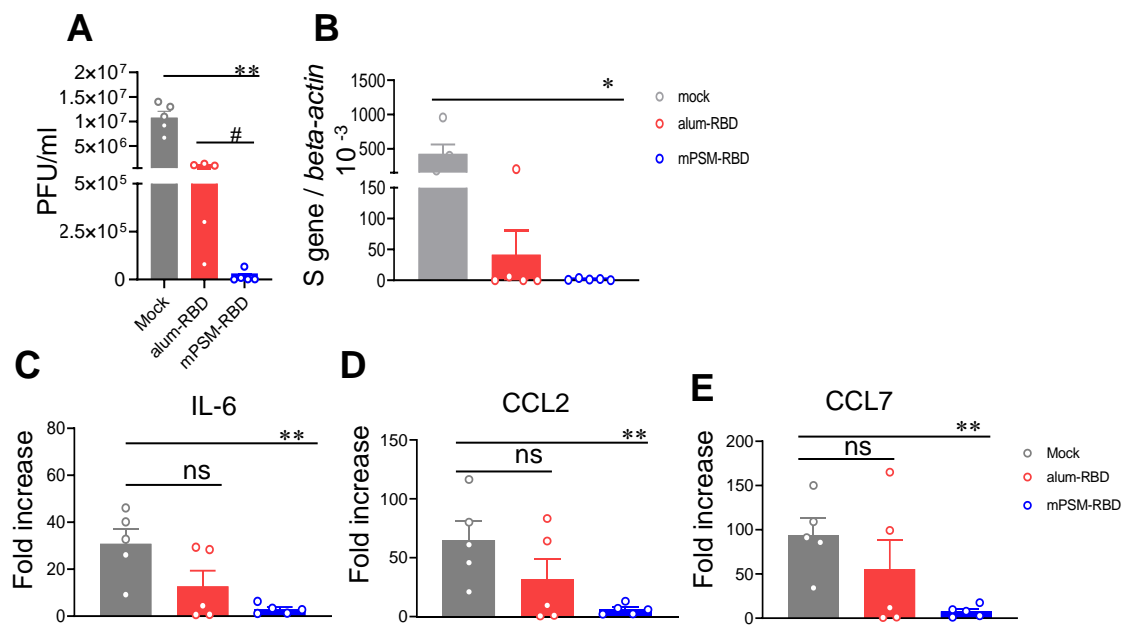

**Figure 6**
